# Supplementary material for: The Relative Content and Distribution of Absorbed Volatile Organic Compounds in Rats Administered Asari Radix et Rhizoma Are Different between Powder- and Decoction-Treated Groups
Source: PubMed Central journal article supplement (PMC7582631; doi:10.3390/molecules25194441), 2020-09-27
Supplement: molecules-25-04441-s001.pdf [file molecules-25-04441-s001.pdf]

**The relative content and distribution of absorbed volatile organic compounds in rats administered Asari Radix et Rhizoma are different between powder- and decoction-treated groups**

**Guang-Xue Liu<sup>1</sup>, Feng Xu<sup>1</sup>, Ming-Ying Shang<sup>1,\*</sup>, Xuan Wang<sup>2</sup> and Shao-Qing Cai<sup>1,\*</sup>**

**Supplement materials**

## Figures

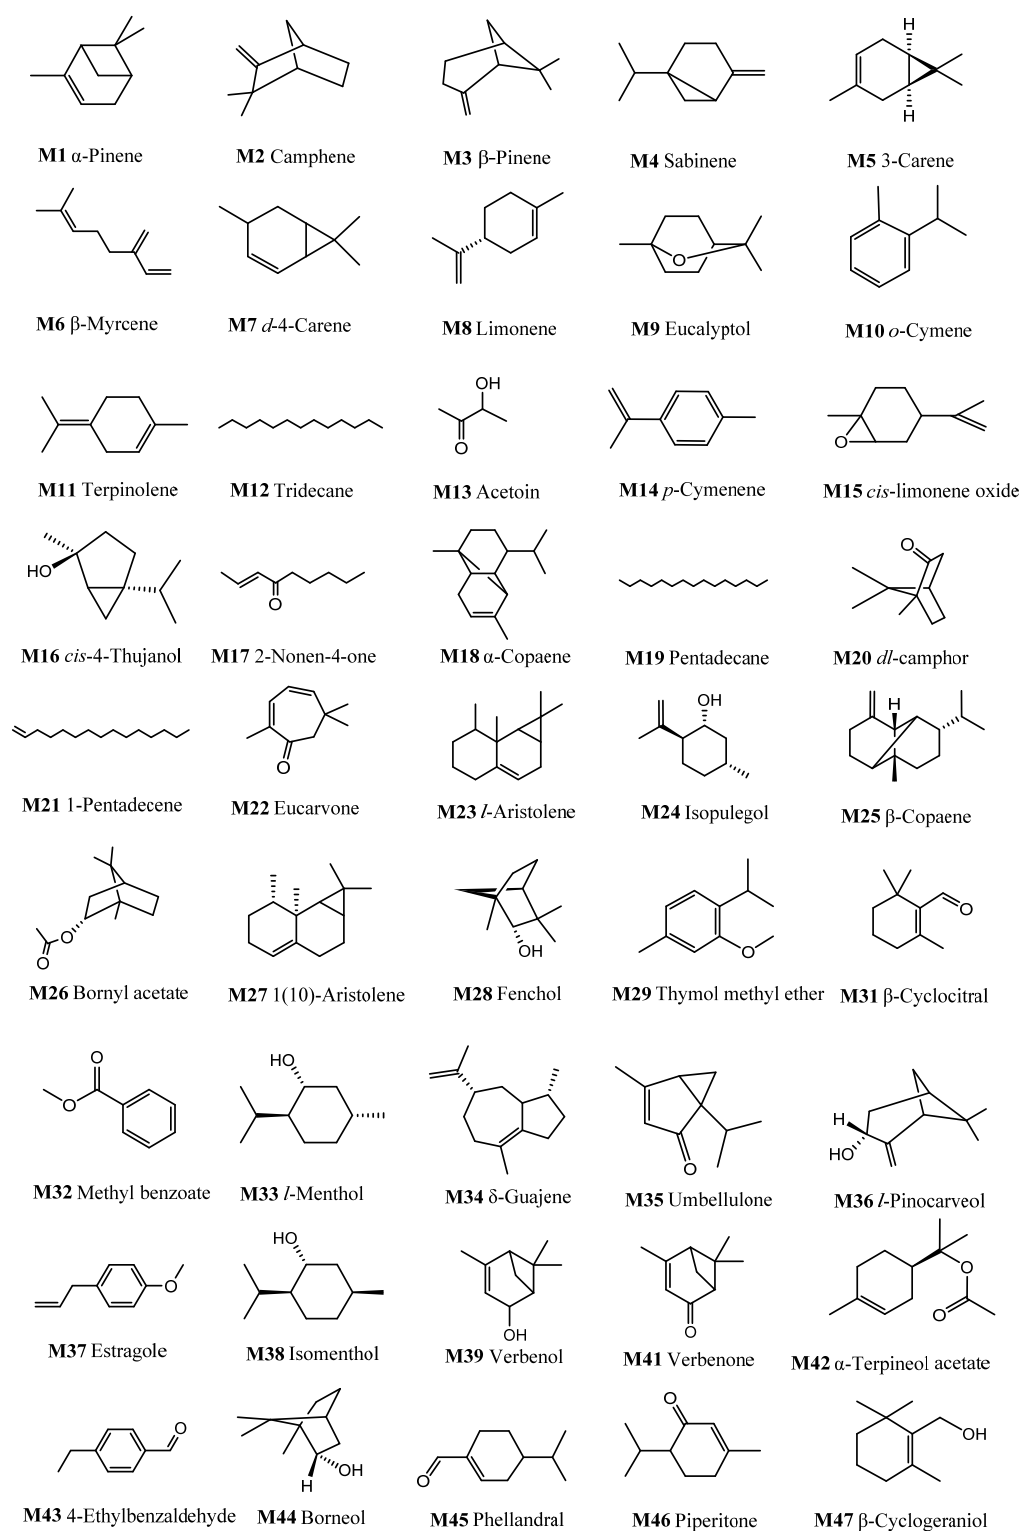

**Figure S1-1.** The volatile compounds identified *in vivo* in rats.

As some compounds can only be identified as isomers, the structures of them are not shown in the figure.

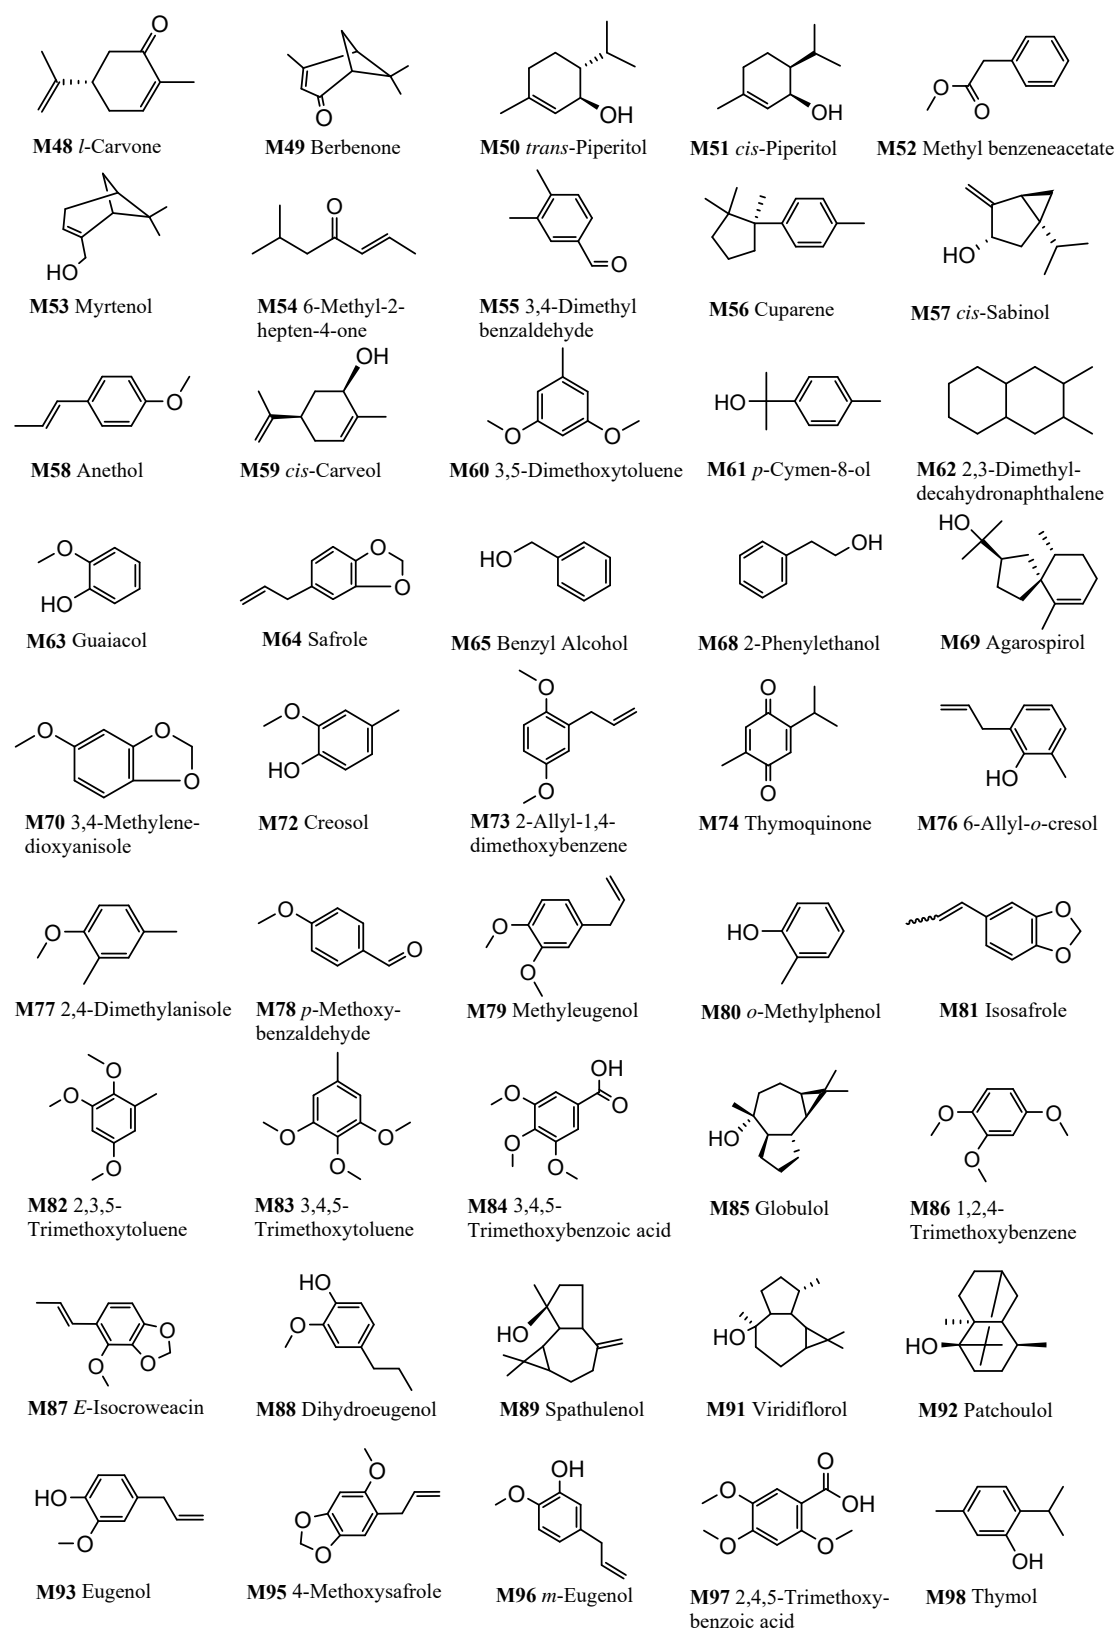

**Figure S1-2.** The volatile compounds identified *in vivo* in rats.

As some compounds can only be identified as isomers, the structures of them are not shown in the figure.

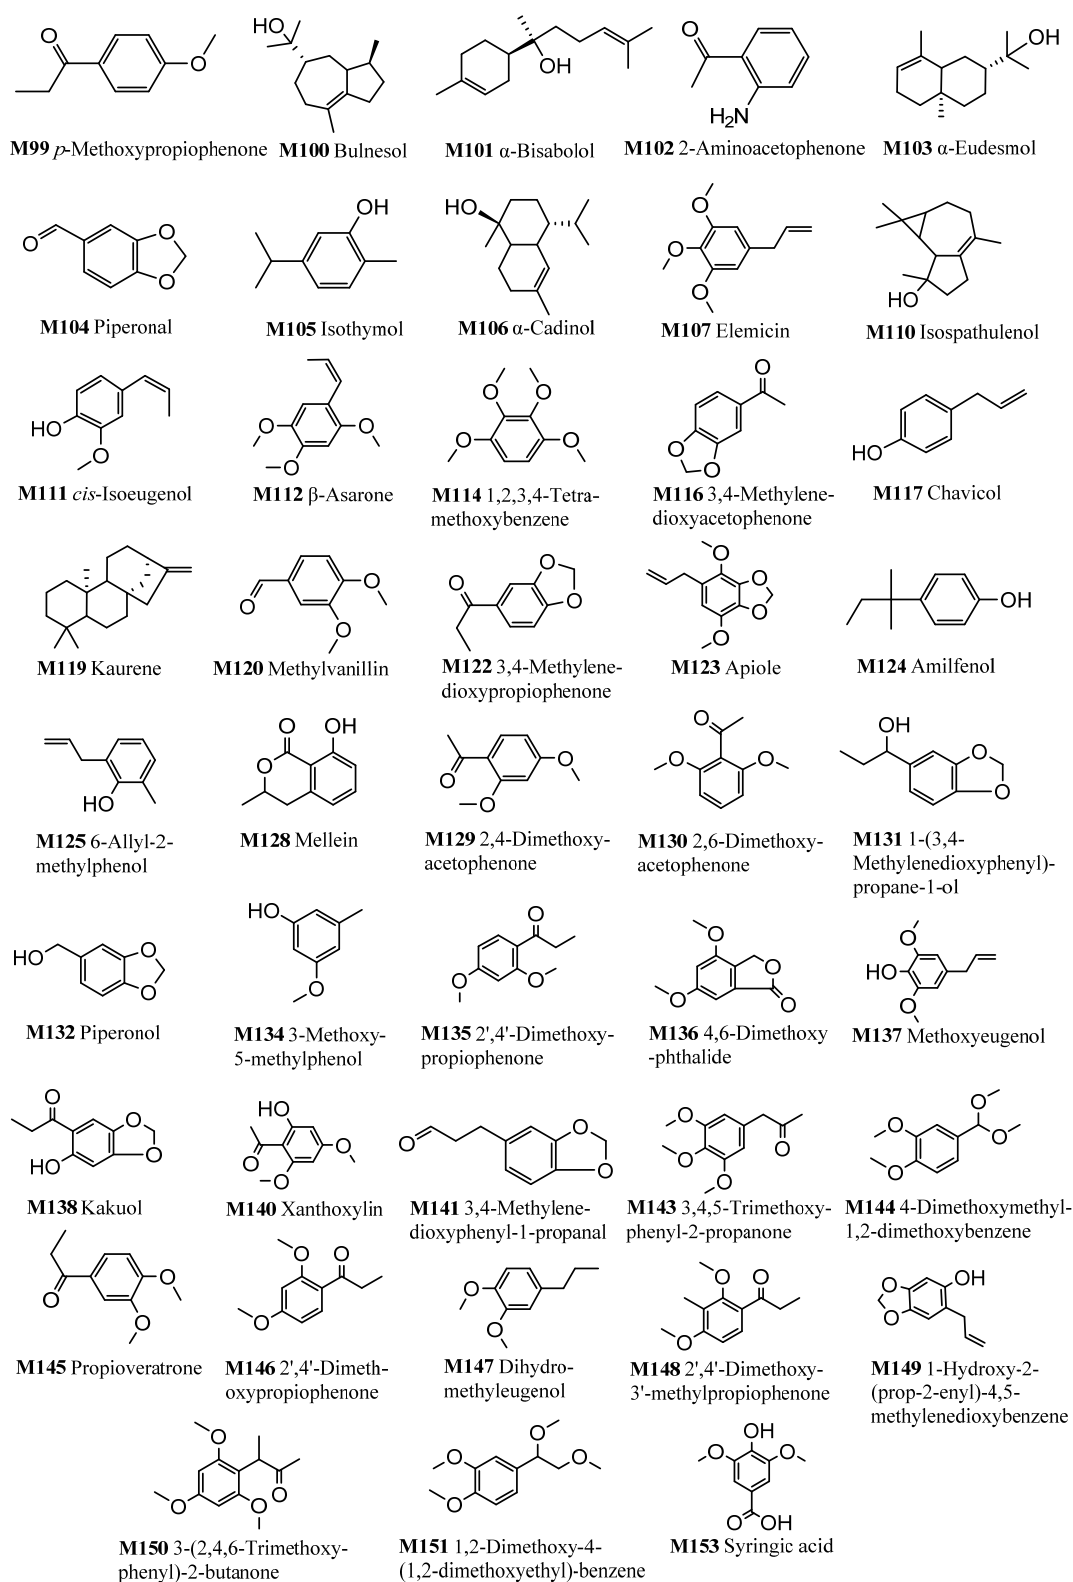

**Figure S1-3.** The volatile compounds identified *in vivo* in rats.

As some compounds could only be identified as isomers, the structures of them were not shown in the figure.

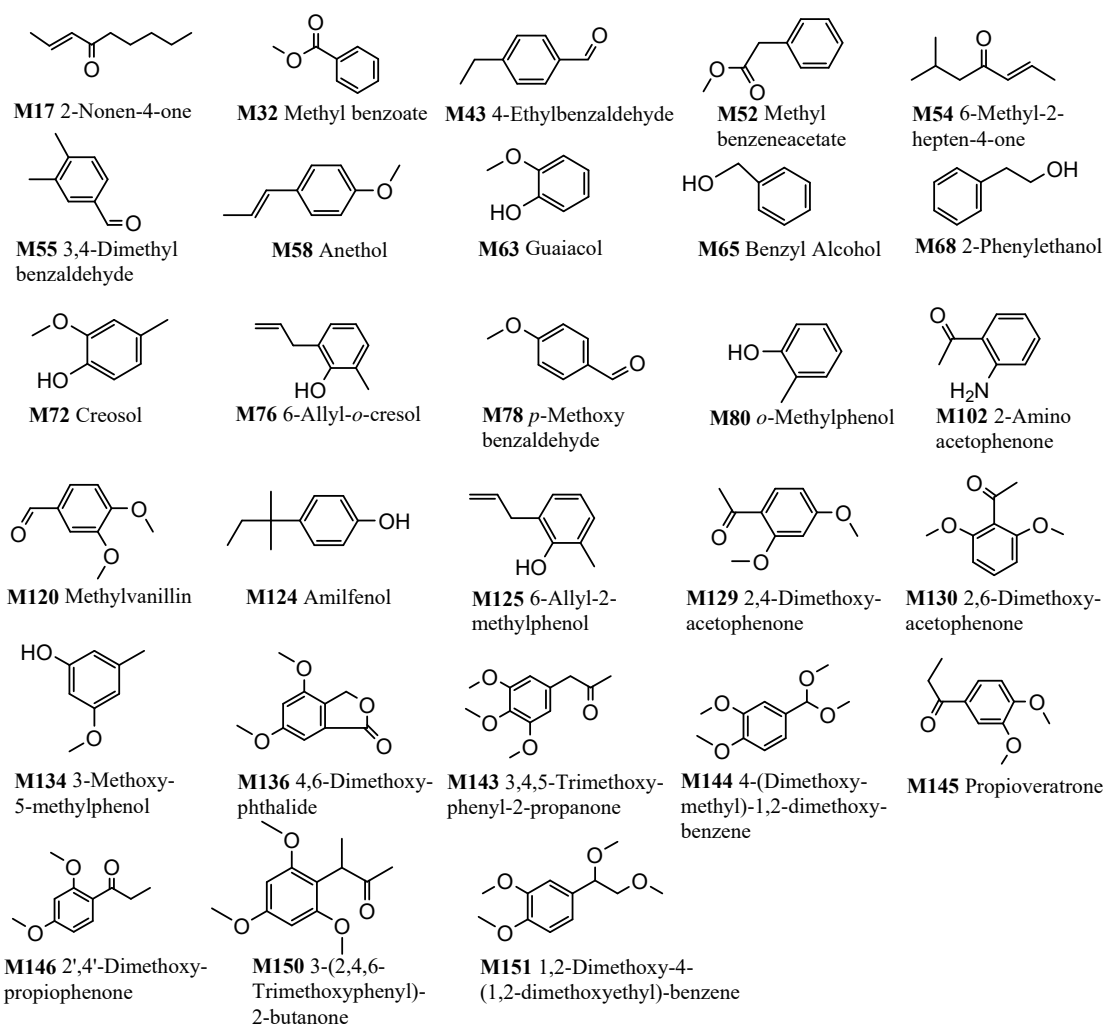

**Figure S2.** The unclassified compounds identified *in vivo* in rats.

Unclassified compounds were identified in the ARR treated groups, but could not be found in either the control group or the ARR sample itself, suggesting that they might be metabolites of constituents or endogenous substances generated after the administration of ARR. As some compounds could only be identified as isomers, the structures of them were not shown in the figure.





**Table S2.** The information of 52 VOCs identified in the feces of rats in ARR powder-treated group by

## HS-SPME-GC-MS

| No. <sup>a</sup> | Compounds                                 | t <sub>R</sub> (min) | MW  | Formula                                        | Ion <sup>b</sup> | Area    | C (%) <sup>c</sup> | Identification <sup>d</sup> | RI <sup>e</sup> |
|------------------|-------------------------------------------|----------------------|-----|------------------------------------------------|------------------|---------|--------------------|-----------------------------|-----------------|
| M1               | $\alpha$ -Pinene                          | 3.785                | 136 | C <sub>10</sub> H <sub>16</sub>                | 93               | 171932  | 0.49               | MS, RI                      | 1021            |
| M2               | Camphene                                  | 4.375                | 136 | C <sub>10</sub> H <sub>16</sub>                | 93               | 32827   | 0.09               | MS, RI                      | 1060            |
| M3               | $\beta$ -Pinene                           | 4.955                | 136 | C <sub>10</sub> H <sub>16</sub>                | 93               | 245739  | 0.70               | MS, RI, REF                 | 1099            |
| M4               | Sabinene                                  | 5.175                | 136 | C <sub>10</sub> H <sub>16</sub>                | 93               | 31865   | 0.09               | MS, RI                      | 1110            |
| M5               | 3-Carene                                  | 5.700                | 136 | C <sub>10</sub> H <sub>16</sub>                | 93               | 66866   | 0.19               | MS, RI                      | 1135            |
| M6               | $\beta$ -Myrcene                          | 6.080                | 136 | C <sub>10</sub> H <sub>16</sub>                | 93               | 23037   | 0.07               | MS, RI                      | 1154            |
| M8               | Limonene                                  | 6.830                | 136 | C <sub>10</sub> H <sub>16</sub>                | 93               | 22517   | 0.06               | MS, RI, REF                 | 1191            |
| M9               | Eucalyptol                                | 7.095                | 154 | C <sub>10</sub> H <sub>18</sub> O              | 81               | 62464   | 0.18               | MS, RI                      | 1204            |
| M10              | <i>o</i> -Cymene                          | 8.630                | 134 | C <sub>10</sub> H <sub>14</sub>                | 119              | 70263   | 0.20               | MS, RI                      | 1267            |
| M11              | Terpinolene                               | 8.895                | 136 | C <sub>10</sub> H <sub>16</sub>                | 93               | 8324    | 0.02               | MS, RI                      | 1279            |
| M16              | <i>cis</i> -4-Thujanol                    | 13.795               | 154 | C <sub>10</sub> H <sub>18</sub> O              | 111              | 4598    | 0.01               | MS, RI                      | 1462            |
| M18              | $\alpha$ -Copaene                         | 14.485               | 204 | C <sub>15</sub> H <sub>24</sub>                | 161              | 16753   | 0.05               | MS, RI                      | 1485            |
| M20              | <i>dl</i> -Camphor                        | 15.305               | 152 | C <sub>10</sub> H <sub>16</sub> O              | 95               | 87854   | 0.25               | MS, RI                      | 1507            |
| M22              | Eucarvone                                 | 17.060               | 150 | C <sub>10</sub> H <sub>14</sub> O              | 107              | 141683  | 0.40               | MS, REF                     | 1543            |
| M23              | <i>l</i> -Aristolene                      | 17.560               | 204 | C <sub>15</sub> H <sub>24</sub>                | 105              | 28432   | 0.08               | MS, RI                      | 1553            |
| M24              | Isopulegol                                | 17.720               | 154 | C <sub>10</sub> H <sub>18</sub> O              | 139              | 3377    | 0.01               | MS, RI                      | 1556            |
| M25              | $\beta$ -Copaene                          | 18.115               | 204 | C <sub>15</sub> H <sub>24</sub>                | 161              | 12845   | 0.04               | MS, RI                      | 1565            |
| M26              | Bornyl acetate                            | 18.305               | 196 | C <sub>12</sub> H <sub>20</sub> O <sub>2</sub> | 95               | 33587   | 0.10               | MS, RI                      | 1568            |
| M27              | 1(10)-Aristolene                          | 18.760               | 204 | C <sub>15</sub> H <sub>24</sub>                | 161              | 190475  | 0.54               | MS, RI                      | 1577            |
| M34              | $\delta$ -Guaiene                         | 21.535               | 204 | C <sub>15</sub> H <sub>24</sub>                | 93               | 52101   | 0.15               | MS, RI                      | 1626            |
| M44              | Borneol                                   | 25.875               | 154 | C <sub>10</sub> H <sub>18</sub> O              | 95               | 4673426 | 13.32              | MS, RI                      | 1694            |
| M54              | 6-Methyl-2-hepten-4-one                   | 32.060               | 126 | C <sub>8</sub> H <sub>14</sub> O               | 111              | 24937   | 0.07               | MS                          | 1790            |
| M58              | Anethol                                   | 33.265               | 148 | C <sub>10</sub> H <sub>12</sub> O              | 148              | 56098   | 0.16               | MS, RI                      | 1815            |
| M60              | 3,5-Dimethoxytoluene                      | 34.260               | 152 | C <sub>9</sub> H <sub>10</sub> O <sub>2</sub>  | 152              | 7192478 | 20.51              | MS, RI, REF                 | 1841            |
| M64              | Safrole                                   | 35.110               | 162 | C <sub>10</sub> H <sub>10</sub> O <sub>2</sub> | 162              | 3252027 | 9.27               | MS, RI, REF                 | 1863            |
| M69              | Agarospirol                               | 37.365               | 222 | C <sub>15</sub> H <sub>26</sub> O              | 207              | 33421   | 0.10               | MS                          | 1928            |
| M71              | Isosafrole isomer                         | 37.575               | 162 | C <sub>10</sub> H <sub>10</sub> O <sub>2</sub> | 162              | 52447   | 0.15               | MS                          | 1936            |
| M79              | Methyleugenol                             | 39.715               | 178 | C <sub>11</sub> H <sub>14</sub> O <sub>2</sub> | 178              | 2044322 | 5.83               | MS, RI, REF                 | 2011            |
| M81              | Isosafrole                                | 39.925               | 162 | C <sub>10</sub> H <sub>10</sub> O <sub>2</sub> | 162              | 2345048 | 6.69               | MS, RI                      | 2020            |
| M82              | 2,3,5-Trimethoxytoluene                   | 40.415               | 182 | C <sub>10</sub> H <sub>14</sub> O <sub>3</sub> | 167              | 3452503 | 9.84               | REF                         | 2040            |
| M83              | 3,4,5-Trimethoxytoluene                   | 40.610               | 182 | C <sub>10</sub> H <sub>14</sub> O <sub>3</sub> | 182              | 4069981 | 11.60              | MS, RI, REF                 | 2048            |
| M84              | 3,4,5-Trimethoxybenzoic acid              | 40.780               | 212 | C <sub>10</sub> H <sub>12</sub> O <sub>5</sub> | 212              | 40435   | 0.12               | MS                          | 2056            |
| M85              | Globulol                                  | 40.910               | 222 | C <sub>15</sub> H <sub>26</sub> O              | 95               | 21896   | 0.06               | MS, RI                      | 2061            |
| M87              | <i>E</i> -Isocrocein                      | 41.755               | 192 | C <sub>11</sub> H <sub>12</sub> O <sub>3</sub> | 192              | 541442  | 1.54               | MS                          | 2096            |
| M89              | Spathulenol                               | 42.110               | 220 | C <sub>15</sub> H <sub>24</sub> O              | 205              | 17215   | 0.05               | MS, RI                      | 2112            |
| M93              | Eugenol                                   | 43.250               | 164 | C <sub>10</sub> H <sub>12</sub> O <sub>2</sub> | 164              | 101999  | 0.29               | MS, RI, REF                 | 2166            |
| M95              | 4-Methoxysafrole                          | 43.745               | 192 | C <sub>11</sub> H <sub>12</sub> O <sub>3</sub> | 192              | 2347538 | 6.69               | MS, RI                      | 2189            |
| M98              | Thymol                                    | 43.850               | 150 | C <sub>10</sub> H <sub>14</sub> O              | 135              | 594176  | 1.69               | MS, RI                      | 2194            |
| M100             | Bulnesol                                  | 44.010               | 222 | C <sub>15</sub> H <sub>26</sub> O              | 161              | 20620   | 0.06               | MS, RI                      | 2202            |
| M103             | $\alpha$ -Eudesmol                        | 44.325               | 222 | C <sub>15</sub> H <sub>26</sub> O              | 149              | 26197   | 0.07               | MS, RI                      | 2219            |
| M106             | $\alpha$ -Cadinol                         | 44.435               | 222 | C <sub>15</sub> H <sub>26</sub> O              | 121              | 37560   | 0.11               | MS, RI                      | 2225            |
| M113             | 1,2,4-Trimethoxybenzene isomer            | 45.360               | 168 | C <sub>9</sub> H <sub>12</sub> O <sub>3</sub>  | 168              | 556981  | 1.59               | MS                          | 2273            |
| M114             | 1,2,3,4-Tetramethoxybenzene               | 45.590               | 198 | C <sub>9</sub> H <sub>14</sub> O <sub>4</sub>  | 198              | 123993  | 0.35               | MS, RI                      | 2286            |
| M119             | Kaurene                                   | 46.785               | 272 | C <sub>20</sub> H <sub>32</sub>                | 257              | 14646   | 0.04               | MS, RI                      | 2362            |
| M122             | 3,4-Methylenedioxypropiofenone            | 47.395               | 178 | C <sub>10</sub> H <sub>10</sub> O <sub>3</sub> | 149              | 400045  | 1.14               | MS, REF                     | 2405            |
| M126             | Methoxyeugenol isomer                     | 47.835               | 194 | C <sub>11</sub> H <sub>14</sub> O <sub>3</sub> | 194              | 15324   | 0.04               | MS                          | 2441            |
| M127             | Kakuol isomer                             | 47.895               | 194 | C <sub>10</sub> H <sub>10</sub> O <sub>4</sub> | 165              | 116814  | 0.33               | MS                          | 2447            |
| M131             | 1-(3,4-Methylenedioxyphenyl)-propane-1-ol | 48.770               | 180 | C <sub>10</sub> H <sub>12</sub> O <sub>3</sub> | 151              | 13032   | 0.04               | MS                          | 2520            |
| M135             | 2',4'-Dimethoxypropiofenone               | 49.045               | 194 | C <sub>11</sub> H <sub>14</sub> O <sub>3</sub> | 165              | 22552   | 0.06               | MS                          | 2544            |
| M138             | Kakuol                                    | 49.295               | 194 | C <sub>10</sub> H <sub>10</sub> O <sub>4</sub> | 165              | 1360464 | 3.88               | MS, REF                     | 2567            |
| M140             | Xanthoxilin                               | 49.760               | 196 | C <sub>10</sub> H <sub>10</sub> O <sub>4</sub> | 181              | 42216   | 0.12               | MS                          | 2608            |
| M148             | 2',4'-Dimethoxy-3'-methylpropiofenone     | 51.435               | 208 | C <sub>12</sub> H <sub>16</sub> O <sub>3</sub> | 179              | 155025  | 0.44               | MS                          | 2734            |

<sup>a</sup> Compounds identified in feces, urine, blood, and eight organ samples (brain, heart, lung, spleen, liver, kidney, stomach, and small intestine) are sorted by retention time (t<sub>R</sub>), and their polarity increases with prolonged retention time. <sup>b</sup> Ion and <sup>c</sup> C (%): Contents were calculated from extracted ion chromatography (EIC) according to area generalization method. <sup>d</sup> Identification: MS: searching mass spectra in NIST 11(version 2011, National Institute of Standards and Technology, USA) library embedded in GC-MS workstation (GCMS solutions, version 2.71, Shimadzu, Kyoto, Japan); RI: comparing retention index (RI) and mass spectra with literature; REF: comparing retention time and mass spectra with reference compounds. <sup>e</sup> RI: calculating based on the C<sub>7</sub>–C<sub>30</sub> saturated alkanes. The note of Table S2 is also suitable for Tables S3–S23 in the supplement material.



**Table S3.** The information of 68 VOCs identified in the urine of rats in ARR powder-treated group by

## HS-SPME-GC-MS

| No.  | Compounds                           | t <sub>R</sub> (min) | MW  | Formula                                        | Ion | Area     | C (%) | Identification | RI   |
|------|-------------------------------------|----------------------|-----|------------------------------------------------|-----|----------|-------|----------------|------|
| M15  | <i>cis</i> -Limonene oxide          | 13.135               | 152 | C <sub>10</sub> H <sub>16</sub> O              | 137 | 4428     | 0.01  | MS, RI         | 1441 |
| M17  | 2-Nonen-4-one                       | 14.270               | 140 | C <sub>9</sub> H <sub>16</sub> O               | 69  | 57292    | 0.12  | MS, RI         | 1477 |
| M20  | <i>dl</i> -Camphor                  | 15.340               | 152 | C <sub>10</sub> H <sub>16</sub> O              | 95  | 128740   | 0.27  | MS, RI         | 1508 |
| M22  | Eucarvone                           | 17.095               | 150 | C <sub>10</sub> H <sub>14</sub> O              | 107 | 821759   | 1.75  | MS, REF        | 1544 |
| M24  | Isopulegol                          | 17.710               | 154 | C <sub>10</sub> H <sub>18</sub> O              | 139 | 3632     | 0.01  | MS, RI         | 1556 |
| M28  | Fenchol                             | 18.920               | 154 | C <sub>10</sub> H <sub>18</sub> O              | 81  | 18757    | 0.04  | MS, RI         | 1581 |
| M31  | β-Cyclocitral                       | 20.510               | 152 | C <sub>10</sub> H <sub>16</sub> O              | 137 | 12398    | 0.03  | MS, RI         | 1610 |
| M33  | <i>l</i> -Menthhol                  | 21.220               | 156 | C <sub>10</sub> H <sub>20</sub> O              | 95  | 10123    | 0.02  | MS, RI         | 1621 |
| M35  | Umbellulone                         | 21.815               | 150 | C <sub>10</sub> H <sub>14</sub> O              | 108 | 22890    | 0.05  | MS, RI         | 1630 |
| M36  | <i>l</i> -Pinocarveol               | 23.120               | 152 | C <sub>10</sub> H <sub>16</sub> O              | 92  | 33448    | 0.07  | MS, RI         | 1651 |
| M38  | Isomenthol                          | 24.295               | 156 | C <sub>10</sub> H <sub>20</sub> O              | 59  | 10354    | 0.02  | MS, RI         | 1670 |
| M40  | Eucarvone isomer                    | 24.990               | 150 | C <sub>10</sub> H <sub>14</sub> O              | 107 | 65723    | 0.14  | MS             | 1680 |
| M44  | Borneol                             | 25.895               | 154 | C <sub>10</sub> H <sub>18</sub> O              | 95  | 4981465  | 10.58 | MS, RI         | 1695 |
| M45  | Phellandral                         | 26.415               | 154 | C <sub>10</sub> H <sub>18</sub> O              | 109 | 34705    | 0.07  | MS, RI         | 1703 |
| M46  | Piperitone                          | 26.610               | 152 | C <sub>10</sub> H <sub>16</sub> O              | 82  | 22856    | 0.05  | MS, RI         | 1706 |
| M47  | β-Cyclogeraniol                     | 26.960               | 154 | C <sub>10</sub> H <sub>18</sub> O              | 93  | 5992     | 0.01  | MS             | 1711 |
| M48  | <i>l</i> -Carvone                   | 27.270               | 150 | C <sub>10</sub> H <sub>14</sub> O              | 82  | 60143    | 0.13  | MS, RI         | 1716 |
| M49  | Berbenone                           | 28.190               | 150 | C <sub>10</sub> H <sub>14</sub> O              | 150 | 34403    | 0.07  | MS, RI         | 1730 |
| M50  | <i>trans</i> -Piperitol             | 29.165               | 154 | C <sub>10</sub> H <sub>18</sub> O              | 84  | 10429    | 0.02  | MS, RI         | 1745 |
| M51  | <i>cis</i> -Piperitol               | 29.485               | 154 | C <sub>10</sub> H <sub>18</sub> O              | 84  | 28096    | 0.06  | MS, RI         | 1750 |
| M52  | Methyl benzeneacetate               | 29.955               | 150 | C <sub>9</sub> H <sub>10</sub> O <sub>2</sub>  | 91  | 28669    | 0.06  | MS, RI         | 1758 |
| M53  | Myrtenol                            | 31.910               | 152 | C <sub>10</sub> H <sub>16</sub> O              | 108 | 5924     | 0.01  | MS, RI         | 1788 |
| M57  | <i>cis</i> -Sabinol                 | 32.645               | 152 | C <sub>10</sub> H <sub>16</sub> O              | 92  | 70666    | 0.15  | MS, RI         | 1799 |
| M59  | <i>cis</i> -Carveol                 | 34.050               | 152 | C <sub>10</sub> H <sub>16</sub> O              | 109 | 22829    | 0.05  | MS, RI         | 1835 |
| M60  | 3,5-Dimethoxytoluene                | 34.265               | 152 | C <sub>9</sub> H <sub>12</sub> O <sub>2</sub>  | 152 | 544677   | 1.16  | MS, RI, REF    | 1841 |
| M61  | <i>p</i> -Cymen-8-ol                | 34.660               | 150 | C <sub>10</sub> H <sub>14</sub> O              | 135 | 261325   | 0.55  | MS, RI         | 1851 |
| M64  | Safrole                             | 35.130               | 162 | C <sub>10</sub> H <sub>10</sub> O <sub>2</sub> | 162 | 44345    | 0.09  | MS, RI, REF    | 1863 |
| M78  | <i>p</i> -Methoxybenzaldehyde       | 39.630               | 136 | C <sub>8</sub> H <sub>8</sub> O <sub>2</sub>   | 135 | 35202    | 0.07  | MS, RI         | 2008 |
| M79  | Methyleugenol                       | 39.710               | 178 | C <sub>11</sub> H <sub>14</sub> O <sub>2</sub> | 178 | 124210   | 0.26  | MS, RI, REF    | 2011 |
| M80  | <i>o</i> -Methylphenol              | 39.730               | 108 | C <sub>7</sub> H <sub>8</sub> O                | 108 | 173080   | 0.37  | MS, RI         | 2012 |
| M81  | Isosafrole                          | 39.925               | 162 | C <sub>10</sub> H <sub>10</sub> O <sub>2</sub> | 162 | 8693     | 0.02  | MS, RI         | 2020 |
| M82  | 2,3,5-Trimethoxytoluene             | 40.415               | 182 | C <sub>10</sub> H <sub>14</sub> O <sub>3</sub> | 167 | 653061   | 1.39  | REF            | 2040 |
| M83  | 3,4,5-Trimethoxytoluene             | 40.610               | 182 | C <sub>10</sub> H <sub>14</sub> O <sub>3</sub> | 182 | 1098531  | 2.33  | MS, RI, REF    | 2048 |
| M88  | Dihydroeugenol                      | 41.970               | 166 | C <sub>10</sub> H <sub>14</sub> O <sub>2</sub> | 137 | 4465141  | 9.48  | MS, RI         | 2106 |
| M90  | Dihydroeugenol isomer               | 42.190               | 166 | C <sub>10</sub> H <sub>14</sub> O <sub>2</sub> | 137 | 344271   | 0.73  | MS             | 2116 |
| M93  | Eugenol                             | 43.255               | 164 | C <sub>10</sub> H <sub>12</sub> O <sub>2</sub> | 164 | 5663865  | 12.03 | MS, RI, REF    | 2166 |
| M94  | 1,2,4-Trimethoxybenzene isomer      | 43.565               | 168 | C <sub>9</sub> H <sub>12</sub> O <sub>3</sub>  | 153 | 1270131  | 2.70  | MS             | 2181 |
| M96  | <i>m</i> -Eugenol                   | 43.780               | 164 | C <sub>10</sub> H <sub>12</sub> O <sub>2</sub> | 164 | 266429   | 0.57  | MS, RI         | 2191 |
| M98  | Thymol                              | 43.850               | 150 | C <sub>10</sub> H <sub>14</sub> O              | 135 | 302999   | 0.64  | MS, RI         | 2194 |
| M104 | Piperonal                           | 44.340               | 150 | C <sub>8</sub> H <sub>6</sub> O <sub>3</sub>   | 149 | 798155   | 1.70  | MS, RI         | 2219 |
| M109 | Methoxyeugenol isomer               | 44.870               | 194 | C <sub>11</sub> H <sub>14</sub> O <sub>3</sub> | 194 | 28455    | 0.06  | MS             | 2248 |
| M111 | <i>cis</i> -Isoeugenol              | 45.080               | 164 | C <sub>10</sub> H <sub>12</sub> O <sub>2</sub> | 164 | 43456    | 0.09  | MS, RI         | 2258 |
| M113 | 1,2,4-Trimethoxybenzene isomer      | 45.325               | 168 | C <sub>9</sub> H <sub>12</sub> O <sub>3</sub>  | 168 | 487523   | 1.04  | MS             | 2273 |
| M114 | 1,2,3,4-Tetramethoxybenzene         | 45.595               | 198 | C <sub>10</sub> H <sub>14</sub> O <sub>4</sub> | 198 | 44397    | 0.09  | MS, RI         | 2286 |
| M115 | 1,2,4-Trimethoxybenzene isomer      | 46.360               | 168 | C <sub>9</sub> H <sub>12</sub> O <sub>3</sub>  | 153 | 258162   | 0.55  | MS             | 2334 |
| M116 | 3,4-Methylenedioxyacetophenone      | 46.400               | 164 | C <sub>9</sub> H <sub>8</sub> O <sub>3</sub>   | 149 | 241710   | 0.51  | MS             | 2337 |
| M117 | Chavicol                            | 46.605               | 134 | C <sub>9</sub> H <sub>10</sub> O               | 134 | 510964   | 1.09  | MS, RI         | 2350 |
| M118 | 1,2,4-Trimethoxybenzene isomer      | 46.670               | 168 | C <sub>9</sub> H <sub>12</sub> O <sub>3</sub>  | 168 | 161265   | 0.34  | MS             | 2355 |
| M120 | Methylvanillin                      | 47.240               | 166 | C <sub>9</sub> H <sub>10</sub> O <sub>3</sub>  | 166 | 54498    | 0.12  | MS, RI         | 2394 |
| M122 | 3,4-Methylenedioxypropiphenone      | 47.400               | 178 | C <sub>10</sub> H <sub>10</sub> O <sub>3</sub> | 149 | 456447   | 0.97  | MS, REF        | 2405 |
| M124 | Amilfenol                           | 47.560               | 164 | C <sub>11</sub> H <sub>16</sub> O              | 135 | 6738     | 0.01  | MS             | 2418 |
| M125 | 6-Allyl-2-methylphenol              | 47.755               | 148 | C <sub>10</sub> H <sub>12</sub> O              | 148 | 10119    | 0.02  | MS             | 2435 |
| M126 | Methoxyeugenol isomer               | 47.830               | 194 | C <sub>11</sub> H <sub>14</sub> O <sub>3</sub> | 194 | 287677   | 0.61  | MS             | 2441 |
| M127 | Kakuol isomer                       | 47.900               | 194 | C <sub>10</sub> H <sub>10</sub> O <sub>4</sub> | 165 | 3467158  | 7.36  | MS             | 2447 |
| M128 | Mellein                             | 48.255               | 178 | C <sub>10</sub> H <sub>10</sub> O <sub>3</sub> | 178 | 36932    | 0.08  | MS, RI         | 2475 |
| M129 | 2,4-Dimethoxyacetophenone           | 48.345               | 180 | C <sub>10</sub> H <sub>12</sub> O <sub>3</sub> | 165 | 50946    | 0.11  | MS             | 2483 |
| M133 | Methoxyeugenol isomer               | 48.935               | 194 | C <sub>11</sub> H <sub>14</sub> O <sub>3</sub> | 194 | 73982    | 0.16  | MS             | 2534 |
| M134 | 3-Methoxy-5-methylphenol            | 48.985               | 138 | C <sub>8</sub> H <sub>10</sub> O <sub>2</sub>  | 138 | 573184   | 1.22  | MS, RI         | 2538 |
| M135 | 2',4'-Dimethoxypropiphenone         | 49.050               | 194 | C <sub>11</sub> H <sub>14</sub> O <sub>3</sub> | 165 | 79181    | 0.17  | MS             | 2544 |
| M138 | Kakuol                              | 49.305               | 194 | C <sub>10</sub> H <sub>10</sub> O <sub>4</sub> | 165 | 16790389 | 35.66 | MS, REF        | 2568 |
| M140 | Xanthoxilin                         | 49.755               | 196 | C <sub>10</sub> H <sub>10</sub> O <sub>4</sub> | 181 | 482144   | 1.02  | MS             | 2608 |
| M141 | 3,4-Methylenedioxyphenyl-1-propanal | 49.915               | 178 | C <sub>10</sub> H <sub>10</sub> O <sub>3</sub> | 178 | 72502    | 0.15  | MS             | 2620 |
| M143 | 3,4,5-Trimethoxyphenyl-2-propanone  | 50.270               | 224 | C <sub>12</sub> H <sub>16</sub> O <sub>4</sub> | 181 | 106370   | 0.23  | MS             | 2648 |
| M145 | Propioveratrone                     | 50.740               | 194 | C <sub>11</sub> H <sub>14</sub> O <sub>3</sub> | 165 | 65475    | 0.14  | MS             | 2686 |

| No.         | Compounds                                                  | t <sub>R</sub> (min) | MW  | Formula                                        | Ion | Area  | C (%) | Identification | RI   |
|-------------|------------------------------------------------------------|----------------------|-----|------------------------------------------------|-----|-------|-------|----------------|------|
| <b>M149</b> | 1-Hydroxy-2-(prop-2-enyl)-4,5-methylenedioxybenzene        | 51.670               | 178 | C <sub>10</sub> H <sub>10</sub> O <sub>3</sub> | 135 | 40318 | 0.09  | MS             | 2750 |
| <b>M150</b> | 3-(2,4,6-Trimethoxyphenyl)-2-butanone                      | 51.850               | 238 | C <sub>13</sub> H <sub>18</sub> O <sub>4</sub> | 149 | 47506 | 0.10  | MS             | 2761 |
| <b>M152</b> | 1-Hydroxy-2-(prop-2-enyl)-4,5-methylenedioxybenzene isomer | 52.665               | 178 | C <sub>10</sub> H <sub>10</sub> O <sub>3</sub> | 178 | 34823 | 0.07  | MS             | 2814 |
| <b>M153</b> | Syringic acid                                              | 55.055               | 198 | C <sub>9</sub> H <sub>10</sub> O <sub>5</sub>  | 198 | 26757 | 0.06  | MS             | 2934 |

The note of Table [S2](#) is also suitable for Table [S3](#).

**Table S4.** The information of 24 VOCs identified in the blood of rats in ARR powder-treated group by HS-SPME-GC-MS

| No.         | Compounds                                 | t <sub>R</sub> (min) | MW  | Formula                                        | Ion | Area    | C (%) | Identification | RI   |
|-------------|-------------------------------------------|----------------------|-----|------------------------------------------------|-----|---------|-------|----------------|------|
| <b>M20</b>  | <i>dl</i> -Camphor                        | 15.305               | 152 | C <sub>10</sub> H <sub>16</sub> O              | 95  | 11894   | 0.11  | MS, RI         | 1508 |
| <b>M22</b>  | Eucarvone                                 | 17.060               | 150 | C <sub>10</sub> H <sub>14</sub> O              | 107 | 69543   | 0.65  | MS, REF        | 1543 |
| <b>M37</b>  | Estragole                                 | 23.905               | 148 | C <sub>10</sub> H <sub>12</sub> O              | 148 | 30309   | 0.28  | MS, RI, REF    | 1664 |
| <b>M44</b>  | Borneol                                   | 25.875               | 154 | C <sub>10</sub> H <sub>18</sub> O              | 95  | 13032   | 0.12  | MS, RI         | 1695 |
| <b>M60</b>  | 3,5-Dimethoxytoluene                      | 34.260               | 152 | C <sub>9</sub> H <sub>12</sub> O <sub>2</sub>  | 152 | 2675747 | 25.02 | MS, RI, REF    | 1841 |
| <b>M64</b>  | Safrole                                   | 35.110               | 162 | C <sub>10</sub> H <sub>10</sub> O <sub>2</sub> | 162 | 2539402 | 23.74 | MS, RI, REF    | 1863 |
| <b>M74</b>  | Thymoquinone                              | 38.880               | 164 | C <sub>10</sub> H <sub>12</sub> O <sub>2</sub> | 149 | 3089    | 0.03  | MS, RI         | 1980 |
| <b>M79</b>  | Methyleugenol                             | 39.715               | 178 | C <sub>11</sub> H <sub>14</sub> O <sub>2</sub> | 178 | 501888  | 4.69  | MS, RI, REF    | 2011 |
| <b>M82</b>  | 2,3,5-Trimethoxytoluene                   | 40.415               | 182 | C <sub>10</sub> H <sub>14</sub> O <sub>3</sub> | 167 | 1913228 | 17.89 | REF            | 2040 |
| <b>M83</b>  | 3,4,5-Trimethoxytoluene                   | 40.610               | 182 | C <sub>10</sub> H <sub>14</sub> O <sub>3</sub> | 182 | 2107637 | 19.71 | MS, RI, REF    | 2048 |
| <b>M84</b>  | 3,4,5-Trimethoxybenzoic acid              | 40.780               | 212 | C <sub>10</sub> H <sub>12</sub> O <sub>5</sub> | 212 | 13334   | 0.12  | MS             | 2056 |
| <b>M87</b>  | <i>E</i> -IsocroWEacin                    | 41.755               | 192 | C <sub>11</sub> H <sub>12</sub> O <sub>3</sub> | 192 | 172532  | 1.61  | MS             | 2097 |
| <b>M95</b>  | 4-Methoxysafrole                          | 43.745               | 192 | C <sub>11</sub> H <sub>12</sub> O <sub>3</sub> | 192 | 234811  | 2.20  | MS, RI         | 2189 |
| <b>M97</b>  | 2,4,5-Trimethoxybenzoic acid              | 43.815               | 212 | C <sub>10</sub> H <sub>12</sub> O <sub>5</sub> | 212 | 14710   | 0.14  | MS             | 2192 |
| <b>M99</b>  | <i>p</i> -MethoxypropioPhenone            | 43.910               | 164 | C <sub>10</sub> H <sub>12</sub> O <sub>2</sub> | 135 | 17908   | 0.17  | MS             | 2197 |
| <b>M104</b> | Piperonal                                 | 44.340               | 150 | C <sub>8</sub> H <sub>6</sub> O <sub>3</sub>   | 149 | 7544    | 0.07  | MS, RI         | 2219 |
| <b>M107</b> | Elemicin                                  | 44.505               | 208 | C <sub>12</sub> H <sub>10</sub> O <sub>3</sub> | 208 | 19365   | 0.18  | MS, RI, REF    | 2228 |
| <b>M108</b> | 3,4,5-Trimethoxytoluene isomer            | 44.765               | 182 | C <sub>10</sub> H <sub>14</sub> O <sub>3</sub> | 182 | 10326   | 0.10  | MS             | 2242 |
| <b>M112</b> | β-Asarone                                 | 45.180               | 208 | C <sub>12</sub> H <sub>16</sub> O <sub>3</sub> | 208 | 4593    | 0.04  | MS, RI, REF    | 2264 |
| <b>M116</b> | 3,4-Methylenedioxyacetophenone            | 46.400               | 164 | C <sub>9</sub> H <sub>8</sub> O <sub>3</sub>   | 149 | 14711   | 0.14  | MS             | 2337 |
| <b>M122</b> | 3,4-MethylenedioxypropioPhenone           | 47.395               | 178 | C <sub>10</sub> H <sub>10</sub> O <sub>3</sub> | 149 | 169092  | 1.58  | MS, REF        | 2405 |
| <b>M131</b> | 1-(3,4-Methylenedioxyphenyl)-propane-1-ol | 48.770               | 180 | C <sub>10</sub> H <sub>12</sub> O <sub>3</sub> | 151 | 15574   | 0.15  | MS             | 2520 |
| <b>M138</b> | Kakuol                                    | 49.295               | 194 | C <sub>10</sub> H <sub>10</sub> O <sub>4</sub> | 165 | 98931   | 0.92  | MS, REF        | 2567 |
| <b>M148</b> | 2',4'-Dimethoxy-3'-methylpropioPhenone    | 51.435               | 208 | C <sub>12</sub> H <sub>16</sub> O <sub>3</sub> | 179 | 36560   | 0.34  | MS             | 2734 |

The note of Table S2 is also suitable for Table S4.

**Table S5.** The information of 16 VOCs identified in the brain of rats in ARR powder-treated group by HS-SPME-GC-MS

| No.         | Compounds                             | t <sub>R</sub> (min) | MW  | Formula                                        | Ion | Area    | C (%) | Identification | RI   |
|-------------|---------------------------------------|----------------------|-----|------------------------------------------------|-----|---------|-------|----------------|------|
| <b>M22</b>  | Eucarvone                             | 17.095               | 150 | C <sub>10</sub> H <sub>14</sub> O              | 107 | 25300   | 0.36  | MS, REF        | 1544 |
| <b>M37</b>  | Estragole                             | 23.970               | 148 | C <sub>10</sub> H <sub>12</sub> O              | 148 | 32455   | 0.47  | MS, RI, REF    | 1664 |
| <b>M43</b>  | 4-Ethylbenzaldehyde                   | 25.830               | 134 | C <sub>9</sub> H <sub>10</sub> O               | 134 | 169319  | 2.44  | MS, RI         | 1693 |
| <b>M60</b>  | 3,5-Dimethoxytoluene                  | 34.280               | 152 | C <sub>9</sub> H <sub>12</sub> O <sub>2</sub>  | 152 | 2476313 | 35.66 | MS, RI, REF    | 1841 |
| <b>M64</b>  | Safrole                               | 35.140               | 162 | C <sub>10</sub> H <sub>10</sub> O <sub>2</sub> | 162 | 1936097 | 27.88 | MS, RI, REF    | 1863 |
| <b>M79</b>  | Methyleugenol                         | 39.720               | 178 | C <sub>11</sub> H <sub>14</sub> O <sub>2</sub> | 178 | 398322  | 5.74  | MS, RI, REF    | 2011 |
| <b>M82</b>  | 2,3,5-Trimethoxytoluene               | 40.420               | 182 | C <sub>10</sub> H <sub>14</sub> O <sub>3</sub> | 167 | 750919  | 10.81 | REF            | 2041 |
| <b>M83</b>  | 3,4,5-Trimethoxytoluene               | 40.615               | 182 | C <sub>10</sub> H <sub>14</sub> O <sub>3</sub> | 182 | 641840  | 9.24  | MS, RI, REF    | 2049 |
| <b>M87</b>  | <i>E</i> -Isocroweacin                | 41.760               | 192 | C <sub>11</sub> H <sub>12</sub> O <sub>3</sub> | 192 | 88522   | 1.27  | MS             | 2096 |
| <b>M95</b>  | 4-Methoxysafrole                      | 43.755               | 192 | C <sub>11</sub> H <sub>12</sub> O <sub>3</sub> | 192 | 214327  | 3.09  | MS, RI         | 2190 |
| <b>M99</b>  | <i>p</i> -Methoxypropiofenone         | 43.915               | 164 | C <sub>10</sub> H <sub>12</sub> O <sub>2</sub> | 135 | 10483   | 0.15  | MS             | 2197 |
| <b>M107</b> | Elemicin                              | 44.500               | 208 | C <sub>12</sub> H <sub>16</sub> O <sub>3</sub> | 208 | 11114   | 0.16  | MS, RI, REF    | 2228 |
| <b>M108</b> | 3,4,5-Trimethoxytoluene isomer        | 44.770               | 182 | C <sub>10</sub> H <sub>14</sub> O <sub>3</sub> | 182 | 3793    | 0.05  | MS             | 2242 |
| <b>M122</b> | 3,4-Methylenedioxypropiofenone        | 47.400               | 178 | C <sub>10</sub> H <sub>10</sub> O <sub>3</sub> | 149 | 100124  | 1.44  | MS, REF        | 2406 |
| <b>M138</b> | Kakuol                                | 49.300               | 194 | C <sub>10</sub> H <sub>10</sub> O <sub>4</sub> | 165 | 67174   | 0.97  | MS, REF        | 2567 |
| <b>M148</b> | 2',4'-Dimethoxy-3'-methylpropiofenone | 51.455               | 208 | C <sub>12</sub> H <sub>16</sub> O <sub>3</sub> | 179 | 18747   | 0.27  | MS             | 2736 |

The note of Table S2 is also suitable for Table S5.

**Table S6.** The information of 15 VOCs identified in the heart of rats in ARR powder-treated group by HS-SPME-GC-MS

| No.         | Compounds                             | t <sub>R</sub> (min) | MW  | Formula                                        | Ion | Area    | C (%) | Identification | RI   |
|-------------|---------------------------------------|----------------------|-----|------------------------------------------------|-----|---------|-------|----------------|------|
| <b>M20</b>  | <i>dl</i> -Camphor                    | 15.305               | 152 | C <sub>10</sub> H <sub>16</sub> O              | 95  | 5247    | 0.13  | MS, RI         | 1508 |
| <b>M22</b>  | Eucarvone                             | 17.060               | 150 | C <sub>10</sub> H <sub>14</sub> O              | 107 | 17260   | 0.42  | MS, REF        | 1544 |
| <b>M37</b>  | Estragole                             | 23.905               | 148 | C <sub>10</sub> H <sub>12</sub> O              | 148 | 14670   | 0.35  | MS, RI, REF    | 1665 |
| <b>M43</b>  | 4-Ethylbenzaldehyde                   | 25.830               | 134 | C <sub>9</sub> H <sub>10</sub> O               | 134 | 37670   | 0.91  | MS, RI         | 1694 |
| <b>M60</b>  | 3,5-Dimethoxytoluene                  | 34.260               | 152 | C <sub>9</sub> H <sub>12</sub> O <sub>2</sub>  | 152 | 1447286 | 34.93 | MS, RI, REF    | 1841 |
| <b>M64</b>  | Safrole                               | 35.110               | 162 | C <sub>10</sub> H <sub>10</sub> O <sub>2</sub> | 162 | 981957  | 23.70 | MS, RI, REF    | 1863 |
| <b>M79</b>  | Methyleugenol                         | 39.715               | 178 | C <sub>11</sub> H <sub>14</sub> O <sub>2</sub> | 178 | 263514  | 6.36  | MS, RI, REF    | 2011 |
| <b>M82</b>  | 2,3,5-Trimethoxytoluene               | 40.415               | 182 | C <sub>10</sub> H <sub>14</sub> O <sub>3</sub> | 167 | 544941  | 13.15 | REF            | 2040 |
| <b>M83</b>  | 3,4,5-Trimethoxytoluene               | 40.610               | 182 | C <sub>10</sub> H <sub>14</sub> O <sub>3</sub> | 182 | 460060  | 11.10 | MS, RI, REF    | 2049 |
| <b>M87</b>  | <i>E</i> -Isocroweacin                | 41.755               | 192 | C <sub>11</sub> H <sub>12</sub> O <sub>3</sub> | 192 | 51956   | 1.25  | MS             | 2096 |
| <b>M95</b>  | 4-Methoxysafrole                      | 43.745               | 192 | C <sub>11</sub> H <sub>12</sub> O <sub>3</sub> | 192 | 139456  | 3.37  | MS, RI         | 2189 |
| <b>M107</b> | Elemicin                              | 44.505               | 208 | C <sub>12</sub> H <sub>16</sub> O <sub>3</sub> | 208 | 9808    | 0.24  | MS, RI, REF    | 2228 |
| <b>M122</b> | 3,4-Methylenedioxypropiofenone        | 47.395               | 178 | C <sub>10</sub> H <sub>10</sub> O <sub>3</sub> | 149 | 92509   | 2.23  | MS, REF        | 2406 |
| <b>M138</b> | Kakuol                                | 49.295               | 194 | C <sub>10</sub> H <sub>10</sub> O <sub>4</sub> | 165 | 60200   | 1.45  | MS, REF        | 2567 |
| <b>M148</b> | 2',4'-Dimethoxy-3'-methylpropiofenone | 51.435               | 208 | C <sub>12</sub> H <sub>16</sub> O <sub>3</sub> | 179 | 17005   | 0.41  | MS             | 2735 |

The note of Table S2 is also suitable for Table S6.

**Table S7.** The information of 15 VOCs identified in the lung of rats in ARR powder-treated group by

HS-SPME-GC-MS

| No.         | Compounds                             | t <sub>R</sub> (min) | MW  | Formula                                        | Ion | Area    | C (%) | Identification | RI   |
|-------------|---------------------------------------|----------------------|-----|------------------------------------------------|-----|---------|-------|----------------|------|
| <b>M20</b>  | <i>dl</i> -Camphor                    | 15.290               | 152 | C <sub>10</sub> H <sub>16</sub> O              | 95  | 4213    | 0.12  | MS, RI         | 1507 |
| <b>M22</b>  | Eucarvone                             | 17.055               | 150 | C <sub>10</sub> H <sub>14</sub> O              | 107 | 11913   | 0.33  | MS, REF        | 1543 |
| <b>M37</b>  | Estragole                             | 23.905               | 148 | C <sub>10</sub> H <sub>12</sub> O              | 148 | 18888   | 0.53  | MS, RI, REF    | 1663 |
| <b>M60</b>  | 3,5-Dimethoxytoluene                  | 34.255               | 152 | C <sub>9</sub> H <sub>12</sub> O <sub>2</sub>  | 152 | 1267567 | 35.43 | MS, RI, REF    | 1840 |
| <b>M64</b>  | Safrole                               | 35.110               | 162 | C <sub>10</sub> H <sub>10</sub> O <sub>2</sub> | 162 | 979939  | 27.39 | MS, RI, REF    | 1863 |
| <b>M79</b>  | Methyleugenol                         | 39.720               | 178 | C <sub>11</sub> H <sub>14</sub> O <sub>2</sub> | 178 | 242963  | 6.79  | MS, RI, REF    | 2011 |
| <b>M82</b>  | 2,3,5-Trimethoxytoluene               | 40.415               | 182 | C <sub>10</sub> H <sub>14</sub> O <sub>3</sub> | 167 | 389394  | 10.89 | REF            | 2040 |
| <b>M83</b>  | 3,4,5-Trimethoxytoluene               | 40.610               | 182 | C <sub>10</sub> H <sub>14</sub> O <sub>3</sub> | 182 | 327900  | 9.17  | MS, RI, REF    | 2048 |
| <b>M87</b>  | <i>E</i> -Isocroweacin                | 41.745               | 192 | C <sub>11</sub> H <sub>12</sub> O <sub>3</sub> | 192 | 31167   | 0.87  | MS             | 2096 |
| <b>M93</b>  | Eugenol                               | 43.255               | 164 | C <sub>10</sub> H <sub>12</sub> O <sub>2</sub> | 164 | 53666   | 1.50  | MS, RI, REF    | 2166 |
| <b>M99</b>  | <i>p</i> -Methoxypropiofenone         | 43.920               | 164 | C <sub>10</sub> H <sub>12</sub> O <sub>2</sub> | 135 | 10120   | 0.28  | MS             | 2197 |
| <b>M115</b> | 1,2,4-Trimethoxybenzene isomer        | 46.360               | 168 | C <sub>9</sub> H <sub>12</sub> O <sub>3</sub>  | 153 | 6382    | 0.18  | MS             | 2334 |
| <b>M122</b> | 3,4-Methylenedioxypropiofenone        | 47.400               | 178 | C <sub>10</sub> H <sub>10</sub> O <sub>3</sub> | 149 | 123130  | 3.44  | MS, REF        | 2406 |
| <b>M138</b> | Kakuol                                | 49.300               | 194 | C <sub>10</sub> H <sub>10</sub> O <sub>4</sub> | 165 | 85328   | 2.39  | MS, REF        | 2567 |
| <b>M148</b> | 2',4'-Dimethoxy-3'-methylpropiofenone | 51.445               | 208 | C <sub>12</sub> H <sub>16</sub> O <sub>3</sub> | 179 | 24654   | 0.69  | MS             | 2735 |

The note of Table S2 is also suitable for Table S7.

**Table S8.** The information of 17 VOCs identified in the spleen of rats in ARR powder-treated group by HS-SPME-GC-MS

| No.         | Compounds                                 | t <sub>R</sub> (min) | MW  | Formula                                        | Ion | Area    | C (%) | Identification | RI   |
|-------------|-------------------------------------------|----------------------|-----|------------------------------------------------|-----|---------|-------|----------------|------|
| <b>M22</b>  | Eucarvone                                 | 17.060               | 150 | C <sub>10</sub> H <sub>14</sub> O              | 107 | 46777   | 0.71  | MS, REF        | 1543 |
| <b>M37</b>  | Estragole                                 | 23.905               | 148 | C <sub>10</sub> H <sub>12</sub> O              | 148 | 20289   | 0.31  | MS, RI, REF    | 1664 |
| <b>M44</b>  | Borneol                                   | 25.875               | 154 | C <sub>10</sub> H <sub>18</sub> O              | 95  | 34582   | 0.52  | MS, RI         | 1694 |
| <b>M60</b>  | 3,5-Dimethoxytoluene                      | 34.260               | 152 | C <sub>9</sub> H <sub>12</sub> O <sub>2</sub>  | 152 | 1862216 | 28.13 | MS, RI, REF    | 1840 |
| <b>M64</b>  | Safrole                                   | 35.110               | 162 | C <sub>10</sub> H <sub>10</sub> O <sub>2</sub> | 162 | 1427886 | 21.57 | MS, RI, REF    | 1863 |
| <b>M79</b>  | Methyleugenol                             | 39.715               | 178 | C <sub>11</sub> H <sub>14</sub> O <sub>2</sub> | 178 | 902632  | 13.63 | MS, RI, REF    | 2011 |
| <b>M82</b>  | 2,3,5-Trimethoxytoluene                   | 40.415               | 182 | C <sub>10</sub> H <sub>14</sub> O <sub>3</sub> | 167 | 972738  | 14.69 | REF            | 2040 |
| <b>M83</b>  | 3,4,5-Trimethoxytoluene                   | 40.610               | 182 | C <sub>10</sub> H <sub>14</sub> O <sub>3</sub> | 182 | 588416  | 8.89  | MS, RI, REF    | 2048 |
| <b>M84</b>  | 3,4,5-Trimethoxybenzoic acid              | 40.780               | 212 | C <sub>10</sub> H <sub>12</sub> O <sub>5</sub> | 212 | 6023    | 0.09  | MS             | 2056 |
| <b>M87</b>  | <i>E</i> -Isocroceacin                    | 41.755               | 192 | C <sub>11</sub> H <sub>12</sub> O <sub>3</sub> | 192 | 115040  | 1.74  | MS             | 2096 |
| <b>M93</b>  | Eugenol                                   | 43.250               | 164 | C <sub>10</sub> H <sub>12</sub> O <sub>2</sub> | 164 | 21769   | 0.33  | MS, RI, REF    | 2166 |
| <b>M95</b>  | 4-Methoxysafrole                          | 43.745               | 192 | C <sub>11</sub> H <sub>12</sub> O <sub>3</sub> | 192 | 281324  | 4.25  | MS, RI         | 2189 |
| <b>M99</b>  | <i>p</i> -Methoxypropiofenone             | 43.910               | 164 | C <sub>10</sub> H <sub>12</sub> O <sub>2</sub> | 135 | 14283   | 0.22  | MS             | 2197 |
| <b>M122</b> | 3,4-Methylenedioxypropiofenone            | 47.395               | 178 | C <sub>10</sub> H <sub>10</sub> O <sub>3</sub> | 149 | 115466  | 1.74  | MS, REF        | 2405 |
| <b>M131</b> | 1-(3,4-Methylenedioxyphenyl)-propane-1-ol | 48.770               | 180 | C <sub>10</sub> H <sub>12</sub> O <sub>3</sub> | 151 | 7836    | 0.12  | MS             | 2521 |
| <b>M138</b> | Kakuol                                    | 49.295               | 194 | C <sub>10</sub> H <sub>10</sub> O <sub>4</sub> | 165 | 162096  | 2.45  | MS, REF        | 2567 |
| <b>M148</b> | 2',4'-Dimethoxy-3'-methylpropiofenone     | 51.435               | 208 | C <sub>12</sub> H <sub>16</sub> O <sub>3</sub> | 179 | 40977   | 0.62  | MS             | 2734 |

The note of Table S2 is also suitable for Table S8.

**Table S9.** The information of 28 VOCs identified in the liver of rats in ARR powder-treated group by

HS-SPME-GC-MS

| No.         | Compounds                                 | t <sub>R</sub> (min) | MW  | Formula                                        | Ion | Area    | C (%) | Identification | RI   |
|-------------|-------------------------------------------|----------------------|-----|------------------------------------------------|-----|---------|-------|----------------|------|
| <b>M9</b>   | Eucalyptol                                | 7.095                | 154 | C <sub>10</sub> H <sub>18</sub> O              | 81  | 5195    | 0.03  | MS, RI         | 1203 |
| <b>M20</b>  | <i>dl</i> -Camphor                        | 15.305               | 152 | C <sub>10</sub> H <sub>16</sub> O              | 95  | 58391   | 0.29  | MS, RI         | 1507 |
| <b>M22</b>  | Eucarvone                                 | 17.060               | 150 | C <sub>10</sub> H <sub>14</sub> O              | 107 | 566692  | 2.83  | MS, REF        | 1543 |
| <b>M37</b>  | Estragole                                 | 23.905               | 148 | C <sub>10</sub> H <sub>12</sub> O              | 148 | 98101   | 0.49  | MS, RI, REF    | 1664 |
| <b>M40</b>  | Eucarvone isomer                          | 24.990               | 150 | C <sub>10</sub> H <sub>14</sub> O              | 107 | 14115   | 0.07  | MS             | 1680 |
| <b>M46</b>  | Piperitone                                | 26.610               | 152 | C <sub>10</sub> H <sub>16</sub> O              | 82  | 12951   | 0.06  | MS, RI         | 1706 |
| <b>M49</b>  | Berbenone                                 | 28.190               | 150 | C <sub>10</sub> H <sub>14</sub> O              | 150 | 21376   | 0.11  | MS, RI         | 1731 |
| <b>M60</b>  | 3,5-Dimethoxytoluene                      | 34.260               | 152 | C <sub>9</sub> H <sub>12</sub> O <sub>2</sub>  | 152 | 7085640 | 35.35 | MS, RI, REF    | 1841 |
| <b>M64</b>  | Safrole                                   | 35.110               | 162 | C <sub>10</sub> H <sub>10</sub> O <sub>2</sub> | 162 | 5028955 | 25.09 | MS, RI, REF    | 1863 |
| <b>M70</b>  | 3,4-Methylenedioxyanisole                 | 37.450               | 152 | C <sub>8</sub> H <sub>8</sub> O <sub>3</sub>   | 152 | 3781    | 0.02  | MS             | 1931 |
| <b>M77</b>  | 2,4-Dimethylanisole                       | 39.485               | 136 | C <sub>9</sub> H <sub>12</sub> O               | 121 | 3128    | 0.02  | MS             | 2002 |
| <b>M79</b>  | Methyleugenol                             | 39.715               | 178 | C <sub>11</sub> H <sub>14</sub> O <sub>2</sub> | 178 | 1288382 | 6.43  | MS, RI, REF    | 2011 |
| <b>M81</b>  | Isosafrole                                | 39.925               | 162 | C <sub>10</sub> H <sub>10</sub> O <sub>2</sub> | 162 | 9390    | 0.05  | MS, RI         | 2020 |
| <b>M82</b>  | 2,3,5-Trimethoxytoluene                   | 40.415               | 182 | C <sub>10</sub> H <sub>14</sub> O <sub>3</sub> | 167 | 2262002 | 11.28 | REF            | 2040 |
| <b>M83</b>  | 3,4,5-Trimethoxytoluene                   | 40.610               | 182 | C <sub>10</sub> H <sub>14</sub> O <sub>3</sub> | 182 | 1894040 | 9.45  | MS, RI, REF    | 2048 |
| <b>M84</b>  | 3,4,5-Trimethoxybenzoic acid              | 40.780               | 212 | C <sub>10</sub> H <sub>12</sub> O <sub>5</sub> | 212 | 9546    | 0.05  | MS             | 2056 |
| <b>M87</b>  | <i>E</i> -Isocroceacin                    | 41.755               | 192 | C <sub>11</sub> H <sub>12</sub> O <sub>3</sub> | 192 | 261667  | 1.31  | MS             | 2096 |
| <b>M88</b>  | Dihydroeugenol                            | 41.970               | 166 | C <sub>10</sub> H <sub>14</sub> O <sub>2</sub> | 137 | 13873   | 0.07  | MS, RI         | 2106 |
| <b>M93</b>  | Eugenol                                   | 43.250               | 164 | C <sub>10</sub> H <sub>12</sub> O <sub>2</sub> | 164 | 47780   | 0.24  | MS, RI, REF    | 2166 |
| <b>M95</b>  | 4-Methoxysafrole                          | 43.745               | 192 | C <sub>11</sub> H <sub>12</sub> O <sub>3</sub> | 192 | 762872  | 3.81  | MS, RI         | 2189 |
| <b>M97</b>  | 2,4,5-Trimethoxybenzoic acid              | 43.815               | 212 | C <sub>10</sub> H <sub>12</sub> O <sub>5</sub> | 212 | 12635   | 0.06  | MS             | 2193 |
| <b>M107</b> | Elemicin                                  | 44.505               | 208 | C <sub>12</sub> H <sub>16</sub> O <sub>3</sub> | 208 | 37358   | 0.19  | MS, RI, REF    | 2228 |
| <b>M108</b> | 3,4,5-Trimethoxytoluene isomer            | 44.765               | 182 | C <sub>10</sub> H <sub>14</sub> O <sub>3</sub> | 182 | 9830    | 0.05  | MS             | 2242 |
| <b>M112</b> | β-Asarone                                 | 45.180               | 208 | C <sub>12</sub> H <sub>16</sub> O <sub>3</sub> | 208 | 5206    | 0.03  | MS, RI, REF    | 2264 |
| <b>M122</b> | 3,4-Methylenedioxypropiofenone            | 47.395               | 178 | C <sub>10</sub> H <sub>10</sub> O <sub>3</sub> | 149 | 181736  | 0.91  | MS, REF        | 2405 |
| <b>M131</b> | 1-(3,4-Methylenedioxyphenyl)-propane-1-ol | 48.770               | 180 | C <sub>10</sub> H <sub>12</sub> O <sub>3</sub> | 151 | 24984   | 0.12  | MS             | 2520 |
| <b>M138</b> | Kakuol                                    | 49.295               | 194 | C <sub>10</sub> H <sub>10</sub> O <sub>4</sub> | 165 | 51950   | 0.26  | MS, REF        | 2567 |
| <b>M148</b> | 2',4'-Dimethoxy-3'-methylpropiofenone     | 51.435               | 208 | C <sub>12</sub> H <sub>16</sub> O <sub>3</sub> | 179 | 11636   | 0.06  | MS             | 2735 |

The note of Table S2 is also suitable for Table S9.



**Table S10.** The information of 42 VOCs identified in the kidney of rats in ARR powder-treated group by HS-SPME-GC-MS

| No.  | Compounds                                    | t <sub>R</sub> (min) | MW  | Formula                                        | Ion | Area    | C (%) | Identification | RI   |
|------|----------------------------------------------|----------------------|-----|------------------------------------------------|-----|---------|-------|----------------|------|
| M9   | Eucalyptol                                   | 7.095                | 154 | C <sub>10</sub> H <sub>18</sub> O              | 81  | 12615   | 0.06  | MS, RI         | 1205 |
| M15  | <i>cis</i> -Limonene oxide                   | 13.135               | 152 | C <sub>10</sub> H <sub>16</sub> O              | 137 | 28661   | 0.15  | MS, RI         | 1441 |
| M20  | <i>dl</i> -Camphor                           | 15.305               | 152 | C <sub>10</sub> H <sub>16</sub> O              | 95  | 308053  | 1.58  | MS, RI         | 1508 |
| M22  | Eucarvone                                    | 17.060               | 150 | C <sub>10</sub> H <sub>14</sub> O              | 107 | 1868768 | 9.59  | MS, REF        | 1544 |
| M28  | Fenchol                                      | 18.920               | 154 | C <sub>10</sub> H <sub>18</sub> O              | 81  | 13206   | 0.07  | MS, RI         | 1581 |
| M35  | Umbellulone                                  | 21.815               | 150 | C <sub>10</sub> H <sub>14</sub> O              | 108 | 14764   | 0.08  | MS, RI         | 1631 |
| M37  | Estragole                                    | 23.905               | 148 | C <sub>10</sub> H <sub>12</sub> O              | 148 | 34485   | 0.18  | MS, RI, REF    | 1664 |
| M39  | Verbenol                                     | 24.570               | 152 | C <sub>10</sub> H <sub>16</sub> O              | 57  | 6167    | 0.03  | MS, RI         | 1674 |
| M40  | Eucarvone isomer                             | 24.990               | 150 | C <sub>10</sub> H <sub>14</sub> O              | 107 | 47889   | 0.25  | MS             | 1680 |
| M41  | Verbenone                                    | 25.240               | 150 | C <sub>10</sub> H <sub>14</sub> O              | 107 | 14711   | 0.08  | MS, RI         | 1684 |
| M44  | Borneol                                      | 25.875               | 154 | C <sub>10</sub> H <sub>18</sub> O              | 95  | 736722  | 3.78  | MS, RI         | 1695 |
| M46  | Piperitone                                   | 26.610               | 152 | C <sub>10</sub> H <sub>16</sub> O              | 82  | 55510   | 0.28  | MS, RI         | 1706 |
| M49  | Berbenone                                    | 28.190               | 150 | C <sub>10</sub> H <sub>14</sub> O              | 150 | 78325   | 0.40  | MS, RI         | 1731 |
| M60  | 3,5-Dimethoxytoluene                         | 34.260               | 152 | C <sub>9</sub> H <sub>12</sub> O <sub>2</sub>  | 152 | 4634721 | 23.78 | MS, RI, REF    | 1841 |
| M62  | 2,3-Dimethyldecahydronaphthalene             | 34.995               | 166 | C <sub>12</sub> H <sub>22</sub>                | 95  | 13308   | 0.07  | MS             | 1859 |
| M64  | Safrole                                      | 35.110               | 162 | C <sub>10</sub> H <sub>10</sub> O <sub>2</sub> | 162 | 2475969 | 12.70 | MS, RI, REF    | 1863 |
| M67  | Verbenone isomer                             | 36.360               | 150 | C <sub>10</sub> H <sub>14</sub> O              | 150 | 19107   | 0.10  | MS             | 1895 |
| M74  | Thymoquinone                                 | 38.880               | 164 | C <sub>10</sub> H <sub>12</sub> O <sub>2</sub> | 149 | 42886   | 0.22  | MS             | 1981 |
| M79  | Methyleugenol                                | 39.715               | 178 | C <sub>11</sub> H <sub>14</sub> O <sub>2</sub> | 178 | 877462  | 4.50  | MS, RI, REF    | 2011 |
| M81  | Isosafrole                                   | 39.925               | 162 | C <sub>10</sub> H <sub>10</sub> O <sub>2</sub> | 104 | 1796    | 0.01  | MS, RI         | 2020 |
| M82  | 2,3,5-Trimethoxytoluene                      | 40.415               | 182 | C <sub>10</sub> H <sub>14</sub> O <sub>3</sub> | 167 | 2581811 | 13.25 | REF            | 2041 |
| M83  | 3,4,5-Trimethoxytoluene                      | 40.610               | 182 | C <sub>10</sub> H <sub>14</sub> O <sub>3</sub> | 182 | 2784807 | 14.29 | MS, RI, REF    | 2048 |
| M84  | 3,4,5-Trimethoxybenzoic acid                 | 40.780               | 212 | C <sub>10</sub> H <sub>12</sub> O <sub>3</sub> | 212 | 11601   | 0.06  | MS             | 2055 |
| M87  | <i>E</i> -Isocroceacin                       | 41.755               | 192 | C <sub>11</sub> H <sub>12</sub> O <sub>3</sub> | 192 | 286084  | 1.47  | MS             | 2096 |
| M88  | Dihydroeugenol                               | 41.970               | 166 | C <sub>10</sub> H <sub>14</sub> O <sub>2</sub> | 137 | 20178   | 0.10  | MS, RI         | 2106 |
| M93  | Eugenol                                      | 43.250               | 164 | C <sub>10</sub> H <sub>12</sub> O <sub>2</sub> | 164 | 220027  | 1.13  | MS, RI, REF    | 2166 |
| M94  | 1,2,4-Trimethoxybenzene isomer               | 43.565               | 168 | C <sub>9</sub> H <sub>12</sub> O <sub>3</sub>  | 153 | 336281  | 1.73  | MS             | 2181 |
| M95  | 4-Methoxysafrole                             | 43.745               | 192 | C <sub>11</sub> H <sub>12</sub> O <sub>3</sub> | 192 | 326765  | 1.68  | MS, RI         | 2189 |
| M99  | <i>p</i> -Methoxypropiofenone                | 43.910               | 164 | C <sub>10</sub> H <sub>12</sub> O <sub>2</sub> | 135 | 18242   | 0.09  | MS             | 2197 |
| M107 | Elemicin                                     | 44.505               | 208 | C <sub>12</sub> H <sub>16</sub> O <sub>3</sub> | 208 | 23812   | 0.12  | MS, RI, REF    | 2228 |
| M108 | 3,4,5-Trimethoxytoluene isomer               | 44.765               | 182 | C <sub>10</sub> H <sub>14</sub> O <sub>3</sub> | 182 | 8457    | 0.04  | MS             | 2242 |
| M112 | β-Asarone                                    | 45.180               | 208 | C <sub>12</sub> H <sub>16</sub> O <sub>3</sub> | 208 | 4704    | 0.02  | MS, RI, REF    | 2264 |
| M115 | 1,2,4-Trimethoxybenzene isomer               | 46.360               | 168 | C <sub>9</sub> H <sub>12</sub> O <sub>3</sub>  | 153 | 63038   | 0.32  | MS             | 2334 |
| M117 | Chavicol                                     | 46.605               | 134 | C <sub>9</sub> H <sub>10</sub> O               | 134 | 4596    | 0.02  | MS, RI         | 2351 |
| M122 | 3,4-Methylenedioxypropiofenone               | 47.395               | 178 | C <sub>10</sub> H <sub>10</sub> O <sub>3</sub> | 149 | 196067  | 1.01  | MS, REF        | 2405 |
| M127 | Kakuol isomer                                | 47.895               | 194 | C <sub>10</sub> H <sub>10</sub> O <sub>4</sub> | 165 | 88408   | 0.45  | MS             | 2447 |
| M131 | 1-(3,4-Methylenedioxyphenyl)-propane-1-ol    | 48.770               | 180 | C <sub>10</sub> H <sub>12</sub> O <sub>3</sub> | 151 | 10303   | 0.05  | MS             | 2521 |
| M138 | Kakuol                                       | 49.295               | 194 | C <sub>10</sub> H <sub>10</sub> O <sub>4</sub> | 165 | 1134627 | 5.82  | MS, REF        | 2567 |
| M139 | 2',4'-Dimethoxy-3'-methylpropiofenone isomer | 49.690               | 208 | C <sub>12</sub> H <sub>16</sub> O <sub>3</sub> | 179 | 16160   | 0.08  | MS             | 2602 |
| M140 | Xanthoxilin                                  | 49.760               | 196 | C <sub>10</sub> H <sub>10</sub> O <sub>4</sub> | 181 | 13113   | 0.07  | MS             | 2608 |
| M147 | Dihydromethyleugenol                         | 51.135               | 180 | C <sub>11</sub> H <sub>16</sub> O <sub>2</sub> | 151 | 17373   | 0.09  | MS             | 2714 |
| M148 | 2',4'-Dimethoxy-3'-methylpropiofenone        | 51.435               | 208 | C <sub>12</sub> H <sub>16</sub> O <sub>3</sub> | 179 | 38618   | 0.20  | MS             | 2735 |

The note of Table S2 is also suitable for Table S10.

**Table S11.** The information of 62 VOCs identified in the stomach of rats in ARR powder-treated group by HS-SPME-GC-MS

| No.  | Compounds                                    | t <sub>R</sub> (min) | MW  | Formula                                        | Ion | Area     | C (%) | Identification | RI   |
|------|----------------------------------------------|----------------------|-----|------------------------------------------------|-----|----------|-------|----------------|------|
| M3   | β-Pinene                                     | 4.955                | 136 | C <sub>10</sub> H <sub>16</sub>                | 93  | 17937    | 0.01  | MS, RI, REF    | 1099 |
| M5   | 3-Carene                                     | 5.700                | 136 | C <sub>10</sub> H <sub>16</sub>                | 93  | 23745    | 0.01  | MS, RI         | 1135 |
| M6   | β-Myrcene                                    | 6.080                | 136 | C <sub>10</sub> H <sub>16</sub>                | 93  | 9704     | 0.00  | MS, RI         | 1154 |
| M7   | <i>d</i> -4-Carene                           | 6.405                | 136 | C <sub>10</sub> H <sub>16</sub>                | 93  | 3437     | 0.00  | MS, RI         | 1170 |
| M8   | Limonene                                     | 6.830                | 136 | C <sub>10</sub> H <sub>16</sub>                | 93  | 10445    | 0.00  | MS, RI, REF    | 1191 |
| M9   | Eucalyptol                                   | 7.095                | 154 | C <sub>10</sub> H <sub>18</sub> O              | 81  | 10640    | 0.01  | MS, RI         | 1203 |
| M10  | <i>o</i> -Cymene                             | 8.630                | 134 | C <sub>10</sub> H <sub>14</sub>                | 119 | 55805    | 0.03  | MS, RI         | 1268 |
| M11  | Terpinolene                                  | 8.895                | 136 | C <sub>10</sub> H <sub>16</sub>                | 93  | 5099     | 0.00  | MS, RI         | 1280 |
| M14  | <i>p</i> -Cymene                             | 12.885               | 132 | C <sub>10</sub> H <sub>12</sub>                | 117 | 20044    | 0.01  | MS, RI         | 1433 |
| M20  | <i>dl</i> -Camphor                           | 15.305               | 152 | C <sub>10</sub> H <sub>16</sub> O              | 95  | 105363   | 0.05  | MS, RI         | 1507 |
| M21  | 1-Pentadecene                                | 16.070               | 210 | C <sub>15</sub> H <sub>30</sub>                | 69  | 59636    | 0.03  | MS, RI         | 1523 |
| M22  | Eucarvone                                    | 17.060               | 150 | C <sub>10</sub> H <sub>14</sub> O              | 107 | 984854   | 0.47  | MS, REF        | 1543 |
| M23  | <i>l</i> -Aristolene                         | 17.560               | 204 | C <sub>13</sub> H <sub>24</sub>                | 105 | 21674    | 0.01  | MS, RI         | 1553 |
| M26  | Bornyl acetate                               | 18.305               | 196 | C <sub>12</sub> H <sub>20</sub> O <sub>2</sub> | 95  | 7402     | 0.00  | MS, RI         | 1568 |
| M27  | 1(10)-Aristolene                             | 18.760               | 204 | C <sub>13</sub> H <sub>24</sub>                | 161 | 140429   | 0.07  | MS, RI         | 1577 |
| M29  | Thymol methyl ether                          | 19.390               | 164 | C <sub>11</sub> H <sub>16</sub> O              | 149 | 156458   | 0.07  | MS, RI         | 1590 |
| M30  | <i>l</i> -Aristolene isomer                  | 19.650               | 204 | C <sub>13</sub> H <sub>24</sub>                | 105 | 59094    | 0.03  | MS             | 1596 |
| M31  | β-Cyclocitral                                | 20.510               | 152 | C <sub>10</sub> H <sub>16</sub> O              | 137 | 13979    | 0.01  | MS, RI         | 1610 |
| M34  | δ-Guaiene                                    | 21.535               | 204 | C <sub>13</sub> H <sub>24</sub>                | 93  | 43622    | 0.02  | MS, RI         | 1626 |
| M37  | Estragole                                    | 23.905               | 148 | C <sub>10</sub> H <sub>12</sub> O              | 148 | 790331   | 0.37  | MS, RI, REF    | 1664 |
| M42  | α-Terpinol acetate                           | 25.300               | 196 | C <sub>12</sub> H <sub>20</sub> O <sub>2</sub> | 121 | 38472    | 0.02  | MS, RI         | 1685 |
| M44  | Borneol                                      | 25.875               | 154 | C <sub>10</sub> H <sub>18</sub> O              | 95  | 3043428  | 1.44  | MS, RI         | 1694 |
| M46  | Piperitone                                   | 26.610               | 152 | C <sub>10</sub> H <sub>16</sub> O              | 82  | 32199    | 0.02  | MS, RI         | 1706 |
| M49  | Berbenone                                    | 28.190               | 150 | C <sub>10</sub> H <sub>14</sub> O              | 150 | 16935    | 0.01  | MS, RI         | 1730 |
| M56  | Cuparene                                     | 32.520               | 202 | C <sub>13</sub> H <sub>22</sub>                | 81  | 15065    | 0.01  | MS, RI         | 1797 |
| M59  | <i>cis</i> -Carveol                          | 34.050               | 152 | C <sub>10</sub> H <sub>16</sub> O              | 109 | 7714     | 0.00  | MS, RI         | 1836 |
| M60  | 3,5-Dimethoxytoluene                         | 34.260               | 152 | C <sub>9</sub> H <sub>12</sub> O <sub>2</sub>  | 152 | 35161970 | 16.67 | MS, RI, REF    | 1842 |
| M61  | <i>p</i> -Cymen-8-ol                         | 34.660               | 150 | C <sub>10</sub> H <sub>14</sub> O              | 135 | 101117   | 0.05  | MS, RI         | 1852 |
| M64  | Safrole                                      | 35.110               | 162 | C <sub>10</sub> H <sub>10</sub> O <sub>2</sub> | 162 | 46536941 | 22.07 | MS, RI, REF    | 1865 |
| M70  | 3,4-Methylenedioxyanisole                    | 37.450               | 152 | C <sub>8</sub> H <sub>8</sub> O <sub>3</sub>   | 152 | 24961    | 0.01  | MS             | 1931 |
| M73  | 2-Allyl-1,4-dimethoxybenzene                 | 38.535               | 178 | C <sub>11</sub> H <sub>14</sub> O <sub>2</sub> | 178 | 38310    | 0.02  | MS             | 1968 |
| M75  | Methyleugenol isomer                         | 39.055               | 178 | C <sub>11</sub> H <sub>14</sub> O <sub>2</sub> | 178 | 226534   | 0.11  | MS             | 1986 |
| M79  | Methyleugenol                                | 39.715               | 178 | C <sub>11</sub> H <sub>14</sub> O <sub>2</sub> | 178 | 34994264 | 16.59 | MS, RI, REF    | 2014 |
| M81  | Isosafrole                                   | 39.925               | 162 | C <sub>10</sub> H <sub>10</sub> O <sub>2</sub> | 162 | 38093    | 0.02  | MS, RI         | 2020 |
| M82  | 2,3,5-Trimethoxytoluene                      | 40.415               | 182 | C <sub>10</sub> H <sub>14</sub> O <sub>3</sub> | 167 | 18837881 | 8.93  | REF            | 2042 |
| M83  | 3,4,5-Trimethoxytoluene                      | 40.610               | 182 | C <sub>10</sub> H <sub>14</sub> O <sub>3</sub> | 182 | 17072337 | 8.10  | MS, RI, REF    | 2050 |
| M84  | 3,4,5-Trimethoxybenzoic acid                 | 40.780               | 212 | C <sub>10</sub> H <sub>12</sub> O <sub>5</sub> | 212 | 186084   | 0.09  | MS             | 2056 |
| M85  | Globulol                                     | 40.910               | 222 | C <sub>13</sub> H <sub>26</sub> O              | 95  | 27361    | 0.01  | MS, RI         | 2062 |
| M86  | 1,2,4-Trimethoxybenzene                      | 41.430               | 168 | C <sub>9</sub> H <sub>12</sub> O <sub>3</sub>  | 168 | 6800     | 0.00  | MS, RI         | 2083 |
| M87  | <i>E</i> -Isocroceacin                       | 41.755               | 192 | C <sub>11</sub> H <sub>12</sub> O <sub>3</sub> | 192 | 9026023  | 4.28  | MS             | 2097 |
| M89  | Spathulenol                                  | 42.110               | 220 | C <sub>13</sub> H <sub>24</sub> O              | 205 | 18646    | 0.01  | MS, RI         | 2113 |
| M91  | Viridiflorol                                 | 42.310               | 222 | C <sub>13</sub> H <sub>26</sub> O              | 107 | 19235    | 0.01  | MS, RI         | 2122 |
| M92  | Patchoulol                                   | 43.065               | 222 | C <sub>13</sub> H <sub>26</sub> O              | 83  | 66947    | 0.03  | MS, RI         | 2157 |
| M93  | Eugenol                                      | 43.250               | 164 | C <sub>10</sub> H <sub>12</sub> O <sub>2</sub> | 164 | 198164   | 0.09  | MS, RI, REF    | 2167 |
| M95  | 4-Methoxysafrole                             | 43.745               | 192 | C <sub>11</sub> H <sub>12</sub> O <sub>3</sub> | 192 | 26607474 | 12.62 | MS, RI         | 2191 |
| M101 | α-Bisabolol                                  | 44.200               | 222 | C <sub>15</sub> H <sub>26</sub> O              | 69  | 46602    | 0.02  | MS, RI         | 2212 |
| M105 | Isothymol                                    | 44.390               | 150 | C <sub>10</sub> H <sub>14</sub> O              | 135 | 75209    | 0.04  | MS, RI         | 2222 |
| M107 | Elemicin                                     | 44.505               | 208 | C <sub>12</sub> H <sub>16</sub> O <sub>3</sub> | 208 | 1202961  | 0.57  | MS, RI, REF    | 2228 |
| M108 | 3,4,5-Trimethoxytoluene isomer               | 44.765               | 182 | C <sub>10</sub> H <sub>14</sub> O <sub>3</sub> | 182 | 62708    | 0.03  | MS             | 2242 |
| M110 | Isospathulenol                               | 44.935               | 220 | C <sub>13</sub> H <sub>24</sub> O              | 119 | 17807    | 0.01  | MS, RI         | 2251 |
| M112 | β-Asarone                                    | 45.180               | 208 | C <sub>12</sub> H <sub>16</sub> O <sub>3</sub> | 208 | 279835   | 0.13  | MS, RI, REF    | 2264 |
| M119 | Kaurene                                      | 46.785               | 272 | C <sub>20</sub> H <sub>32</sub>                | 257 | 9673     | 0.00  | MS, RI         | 2363 |
| M122 | 3,4-Methylenedioxypropiphenone               | 47.395               | 178 | C <sub>10</sub> H <sub>10</sub> O <sub>3</sub> | 149 | 3304576  | 1.57  | MS, REF        | 2406 |
| M123 | Apiol                                        | 47.510               | 222 | C <sub>12</sub> H <sub>14</sub> O <sub>4</sub> | 222 | 15846    | 0.01  | MS, RI         | 2415 |
| M127 | Kakuol isomer                                | 47.895               | 194 | C <sub>10</sub> H <sub>10</sub> O <sub>4</sub> | 165 | 274838   | 0.13  | MS             | 2447 |
| M128 | Mellein                                      | 48.255               | 178 | C <sub>10</sub> H <sub>10</sub> O <sub>3</sub> | 178 | 13794    | 0.01  | MS, RI         | 2476 |
| M138 | Kakuol                                       | 49.295               | 194 | C <sub>10</sub> H <sub>10</sub> O <sub>4</sub> | 165 | 8577238  | 4.07  | MS, REF        | 2568 |
| M139 | 2',4'-Dimethoxy-3'-methylpropiphenone isomer | 49.690               | 208 | C <sub>12</sub> H <sub>16</sub> O <sub>3</sub> | 179 | 126691   | 0.06  | MS             | 2602 |
| M140 | Xanthoxylin                                  | 49.760               | 196 | C <sub>10</sub> H <sub>10</sub> O <sub>4</sub> | 181 | 172365   | 0.08  | MS             | 2608 |
| M144 | 4-(Dimethoxymethyl)-1,2-dimethoxybenzene     | 50.615               | 212 | C <sub>11</sub> H <sub>16</sub> O <sub>4</sub> | 181 | 22593    | 0.01  | MS             | 2676 |
| M148 | 2',4'-Dimethoxy-3'-methylpropiphenone        | 51.435               | 208 | C <sub>12</sub> H <sub>16</sub> O <sub>3</sub> | 179 | 1763142  | 0.84  | MS             | 2735 |
| M151 | 1,2-Dimethoxy-4-(1,2-dimethoxyethyl)-benzene | 52.195               | 226 | C <sub>12</sub> H <sub>18</sub> O <sub>4</sub> | 181 | 26600    | 0.01  | MS             | 2785 |

The note of Table S2 is also suitable for Table S11.

**Table S12.** The information of 34 VOCs identified in the small intestine of rats in ARR powder-treated group by HS-SPME-GC-MS

| No.         | Compounds                                     | t <sub>R</sub> (min) | MW  | Formula                                        | Ion | Area     | C (%) | Identification | RI   |
|-------------|-----------------------------------------------|----------------------|-----|------------------------------------------------|-----|----------|-------|----------------|------|
| <b>M5</b>   | 3-Carene                                      | 5.700                | 136 | C <sub>10</sub> H <sub>16</sub>                | 93  | 5960     | 0.01  | MS, RI         | 1136 |
| <b>M9</b>   | Eucalyptol                                    | 7.095                | 154 | C <sub>10</sub> H <sub>18</sub> O              | 81  | 3970     | 0.01  | MS, RI         | 1203 |
| <b>M20</b>  | <i>dl</i> -Camphor                            | 15.305               | 152 | C <sub>10</sub> H <sub>16</sub> O              | 95  | 38131    | 0.06  | MS, RI         | 1507 |
| <b>M22</b>  | Eucarvone                                     | 17.060               | 150 | C <sub>10</sub> H <sub>14</sub> O              | 107 | 342083   | 0.51  | MS, REF        | 1543 |
| <b>M29</b>  | Thymol methyl ether                           | 19.390               | 164 | C <sub>11</sub> H <sub>16</sub> O              | 149 | 31430    | 0.05  | MS, RI         | 1590 |
| <b>M37</b>  | Estragole                                     | 23.905               | 148 | C <sub>10</sub> H <sub>12</sub> O              | 148 | 237350   | 0.35  | MS, RI, REF    | 1664 |
| <b>M44</b>  | Borneol                                       | 25.875               | 154 | C <sub>10</sub> H <sub>18</sub> O              | 95  | 965443   | 1.44  | MS, RI         | 1694 |
| <b>M60</b>  | 3,5-Dimethoxytoluene                          | 34.260               | 152 | C <sub>9</sub> H <sub>12</sub> O <sub>2</sub>  | 152 | 13063274 | 19.44 | MS, RI, REF    | 1841 |
| <b>M64</b>  | Safrole                                       | 35.110               | 162 | C <sub>10</sub> H <sub>10</sub> O <sub>2</sub> | 162 | 16022242 | 23.84 | MS, RI, REF    | 1864 |
| <b>M75</b>  | Methyleugenol isomer                          | 39.055               | 178 | C <sub>11</sub> H <sub>14</sub> O <sub>2</sub> | 178 | 47726    | 0.07  | MS             | 1987 |
| <b>M79</b>  | Methyleugenol                                 | 39.715               | 178 | C <sub>11</sub> H <sub>14</sub> O <sub>2</sub> | 178 | 12384980 | 18.43 | MS, RI, REF    | 2012 |
| <b>M81</b>  | Isosafrole                                    | 39.925               | 162 | C <sub>10</sub> H <sub>10</sub> O <sub>2</sub> | 162 | 8074     | 0.01  | MS, RI         | 2020 |
| <b>M82</b>  | 2,3,5-Trimethoxytoluene                       | 40.415               | 182 | C <sub>10</sub> H <sub>14</sub> O <sub>3</sub> | 167 | 6558575  | 9.76  | REF            | 2041 |
| <b>M83</b>  | 3,4,5-Trimethoxytoluene                       | 40.610               | 182 | C <sub>10</sub> H <sub>14</sub> O <sub>3</sub> | 182 | 5829924  | 8.68  | MS, RI, REF    | 2049 |
| <b>M84</b>  | 3,4,5-Trimethoxybenzoic acid                  | 40.780               | 212 | C <sub>10</sub> H <sub>12</sub> O <sub>5</sub> | 212 | 52814    | 0.08  | MS             | 2056 |
| <b>M85</b>  | Globulol                                      | 40.910               | 222 | C <sub>13</sub> H <sub>26</sub> O              | 95  | 4654     | 0.01  | MS, RI         | 2061 |
| <b>M87</b>  | <i>E</i> -IsocroWEacin                        | 41.755               | 192 | C <sub>11</sub> H <sub>12</sub> O <sub>3</sub> | 192 | 1938867  | 2.89  | MS             | 2096 |
| <b>M88</b>  | Dihydroeugenol                                | 41.970               | 166 | C <sub>10</sub> H <sub>14</sub> O <sub>2</sub> | 137 | 19702    | 0.03  | MS, RI         | 2106 |
| <b>M89</b>  | Spathulenol                                   | 42.110               | 220 | C <sub>13</sub> H <sub>24</sub> O              | 205 | 3124     | 0.00  | MS, RI         | 2113 |
| <b>M91</b>  | Viridiflorol                                  | 42.310               | 222 | C <sub>13</sub> H <sub>26</sub> O              | 107 | 3628     | 0.01  | MS, RI         | 2122 |
| <b>M92</b>  | Patchoulol                                    | 43.065               | 222 | C <sub>15</sub> H <sub>26</sub> O              | 83  | 12351    | 0.02  | MS, RI         | 2157 |
| <b>M93</b>  | Eugenol                                       | 43.250               | 164 | C <sub>10</sub> H <sub>12</sub> O <sub>2</sub> | 164 | 59577    | 0.09  | MS, RI, REF    | 2166 |
| <b>M95</b>  | 4-Methoxysafrole                              | 43.745               | 192 | C <sub>11</sub> H <sub>12</sub> O <sub>3</sub> | 192 | 5769570  | 8.59  | MS, RI         | 2190 |
| <b>M99</b>  | <i>p</i> -MethoxypropioPhenone                | 43.910               | 164 | C <sub>10</sub> H <sub>12</sub> O <sub>2</sub> | 135 | 106617   | 0.16  | MS             | 2197 |
| <b>M107</b> | Elemicin                                      | 44.505               | 208 | C <sub>12</sub> H <sub>16</sub> O <sub>3</sub> | 208 | 294399   | 0.44  | MS, RI, REF    | 2228 |
| <b>M108</b> | 3,4,5-Trimethoxytoluene isomer                | 44.765               | 182 | C <sub>10</sub> H <sub>14</sub> O <sub>3</sub> | 182 | 14044    | 0.02  | MS             | 2242 |
| <b>M122</b> | 3,4-MethylenedioxypropioPhenone               | 47.395               | 178 | C <sub>10</sub> H <sub>10</sub> O <sub>3</sub> | 149 | 786080   | 1.17  | MS, REF        | 2405 |
| <b>M127</b> | Kakuol isomer                                 | 47.895               | 194 | C <sub>10</sub> H <sub>10</sub> O <sub>4</sub> | 165 | 69199    | 0.10  | MS             | 2446 |
| <b>M128</b> | Mellein                                       | 48.255               | 178 | C <sub>10</sub> H <sub>10</sub> O <sub>3</sub> | 178 | 4164     | 0.01  | MS, RI         | 2476 |
| <b>M131</b> | 1-(3,4-Methylenedioxyphenyl)-propane-1-ol     | 48.770               | 180 | C <sub>10</sub> H <sub>12</sub> O <sub>3</sub> | 151 | 66510    | 0.10  | MS             | 2520 |
| <b>M138</b> | Kakuol                                        | 49.295               | 194 | C <sub>10</sub> H <sub>10</sub> O <sub>4</sub> | 165 | 2012314  | 2.99  | MS, REF        | 2567 |
| <b>M139</b> | 2',4'-Dimethoxy-3'-methylpropioPhenone isomer | 49.690               | 208 | C <sub>12</sub> H <sub>16</sub> O <sub>3</sub> | 179 | 35644    | 0.05  | MS             | 2602 |
| <b>M140</b> | Xanthoxilin                                   | 49.760               | 196 | C <sub>10</sub> H <sub>10</sub> O <sub>4</sub> | 181 | 37461    | 0.06  | MS             | 2608 |
| <b>M148</b> | 2',4'-Dimethoxy-3'-methylpropioPhenone        | 51.435               | 208 | C <sub>12</sub> H <sub>16</sub> O <sub>3</sub> | 179 | 370511   | 0.55  | MS             | 2735 |

The note of Table S2 is also suitable for Table S12.

**Table S13.** The information of 20 VOCs identified in the feces of rats in ARR decoction-treated group by HS-SPME-GC-MS

| No.         | Compounds                                 | t <sub>R</sub> (min) | MW  | Formula                                        | Ion | Area   | C (%) | Identification | RI   |
|-------------|-------------------------------------------|----------------------|-----|------------------------------------------------|-----|--------|-------|----------------|------|
| <b>M12</b>  | Tridecane                                 | 9.217                | 184 | C <sub>13</sub> H <sub>28</sub>                | 184 | 3144   | 0.18  | MS, RI, REF    | 1293 |
| <b>M13</b>  | Acetoin                                   | 9.328                | 88  | C <sub>4</sub> H <sub>8</sub> O <sub>2</sub>   | 88  | 108393 | 6.35  | MS, RI         | 1298 |
| <b>M20</b>  | <i>dl</i> -Camphor                        | 15.291               | 152 | C <sub>10</sub> H <sub>16</sub> O              | 95  | 8076   | 0.47  | MS, RI         | 1507 |
| <b>M26</b>  | Bornyl acetate                            | 18.313               | 196 | C <sub>12</sub> H <sub>20</sub> O <sub>2</sub> | 95  | 5905   | 0.35  | MS, RI         | 1568 |
| <b>M44</b>  | Borneol                                   | 25.881               | 154 | C <sub>10</sub> H <sub>18</sub> O              | 95  | 529068 | 31.00 | MS, RI         | 1694 |
| <b>M64</b>  | Safrole                                   | 35.108               | 162 | C <sub>10</sub> H <sub>10</sub> O <sub>2</sub> | 162 | 5797   | 0.34  | MS, RI, REF    | 1863 |
| <b>M79</b>  | Methyleugenol                             | 39.709               | 178 | C <sub>11</sub> H <sub>14</sub> O <sub>2</sub> | 178 | 5220   | 0.31  | MS, RI, REF    | 2011 |
| <b>M81</b>  | Isosafrole                                | 39.931               | 162 | C <sub>10</sub> H <sub>10</sub> O <sub>2</sub> | 162 | 20971  | 1.23  | MS, RI         | 2020 |
| <b>M82</b>  | 2,3,5-Trimethoxytoluene                   | 40.407               | 182 | C <sub>10</sub> H <sub>14</sub> O <sub>3</sub> | 167 | 5492   | 0.32  | REF            | 2040 |
| <b>M83</b>  | 3,4,5-Trimethoxytoluene                   | 40.608               | 182 | C <sub>10</sub> H <sub>14</sub> O <sub>3</sub> | 182 | 11413  | 0.67  | MS, RI, REF    | 2049 |
| <b>M93</b>  | Eugenol                                   | 43.255               | 164 | C <sub>10</sub> H <sub>12</sub> O <sub>2</sub> | 164 | 18756  | 1.10  | MS, RI, REF    | 2167 |
| <b>M95</b>  | 4-Methoxysafrole                          | 43.747               | 192 | C <sub>11</sub> H <sub>12</sub> O <sub>3</sub> | 192 | 11377  | 0.67  | MS, RI         | 2190 |
| <b>M98</b>  | Thymol                                    | 43.870               | 150 | C <sub>10</sub> H <sub>14</sub> O              | 135 | 110911 | 6.50  | MS, RI         | 2197 |
| <b>M102</b> | 2-Aminoacetophenone                       | 44.232               | 135 | C <sub>8</sub> H <sub>9</sub> NO               | 135 | 51990  | 3.05  | MS, RI         | 2214 |
| <b>M105</b> | Isothymol                                 | 44.403               | 150 | C <sub>10</sub> H <sub>14</sub> O              | 135 | 16787  | 0.98  | MS, RI         | 2223 |
| <b>M122</b> | 3,4-Methylenedioxypropiphenone            | 47.392               | 178 | C <sub>10</sub> H <sub>10</sub> O <sub>3</sub> | 149 | 31492  | 1.85  | MS, REF        | 2406 |
| <b>M127</b> | Kakuol isomer                             | 47.901               | 194 | C <sub>10</sub> H <sub>10</sub> O <sub>4</sub> | 165 | 28529  | 1.67  | MS             | 2447 |
| <b>M131</b> | 1-(3,4-Methylenedioxyphenyl)-propane-1-ol | 48.777               | 180 | C <sub>10</sub> H <sub>12</sub> O <sub>3</sub> | 151 | 15360  | 0.90  | MS             | 2521 |
| <b>M138</b> | Kakuol                                    | 49.294               | 194 | C <sub>10</sub> H <sub>10</sub> O <sub>4</sub> | 165 | 702552 | 41.16 | MS, REF        | 2568 |
| <b>M148</b> | 2',4'-Dimethoxy-3'-methylpropiphenone     | 51.439               | 208 | C <sub>12</sub> H <sub>16</sub> O <sub>3</sub> | 179 | 15469  | 0.91  | MS             | 2735 |

The note of Table S2 is also suitable for Table S13.

**Table S14.** The information of 48 VOCs identified in the urine of rats in ARR decoction-treated group by HS-SPME-GC-MS

| No.  | Compounds                                           | t <sub>R</sub> (min) | MW  | Formula                                        | Ion | Area     | C (%) | Identification | RI   |
|------|-----------------------------------------------------|----------------------|-----|------------------------------------------------|-----|----------|-------|----------------|------|
| M20  | <i>dl</i> -Camphor                                  | 15.291               | 152 | C <sub>10</sub> H <sub>16</sub> O              | 95  | 39912    | 0.14  | MS, RI         | 1507 |
| M32  | Methyl benzoate                                     | 20.816               | 136 | C <sub>8</sub> H <sub>8</sub> O <sub>2</sub>   | 136 | 7703     | 0.03  | MS, RI         | 1615 |
| M36  | <i>l</i> -Pinocarveol                               | 23.114               | 152 | C <sub>10</sub> H <sub>16</sub> O              | 92  | 39104    | 0.14  | MS, RI         | 1651 |
| M44  | Borneol                                             | 25.881               | 154 | C <sub>10</sub> H <sub>18</sub> O              | 95  | 1854171  | 6.67  | MS, RI         | 1694 |
| M45  | Phellandral                                         | 26.439               | 154 | C <sub>10</sub> H <sub>18</sub> O              | 109 | 51291    | 0.18  | MS, RI         | 1703 |
| M53  | Myrtenol                                            | 31.916               | 152 | C <sub>10</sub> H <sub>16</sub> O              | 108 | 4134     | 0.01  | MS, RI         | 1788 |
| M55  | 3,4-Dimethylbenzaldehyde                            | 32.061               | 134 | C <sub>9</sub> H <sub>10</sub> O               | 134 | 12324    | 0.04  | MS, RI         | 1790 |
| M59  | <i>cis</i> -Carveol                                 | 34.055               | 152 | C <sub>10</sub> H <sub>16</sub> O              | 109 | 17766    | 0.06  | MS, RI         | 1835 |
| M63  | Guaiaacol                                           | 35.000               | 124 | C <sub>7</sub> H <sub>8</sub> O <sub>2</sub>   | 124 | 140078   | 0.50  | MS, RI         | 1860 |
| M64  | Safrole                                             | 35.108               | 162 | C <sub>10</sub> H <sub>10</sub> O <sub>2</sub> | 162 | 3814     | 0.01  | MS, RI, REF    | 1862 |
| M65  | Benzyl alcohol                                      | 35.662               | 108 | C <sub>7</sub> H <sub>8</sub> O                | 108 | 132548   | 0.48  | MS, RI         | 1877 |
| M68  | 2-Phenylethanol                                     | 36.725               | 122 | C <sub>8</sub> H <sub>10</sub> O               | 122 | 61343    | 0.22  | MS, RI         | 1906 |
| M72  | Creosol                                             | 38.108               | 138 | C <sub>8</sub> H <sub>10</sub> O <sub>2</sub>  | 138 | 84630    | 0.30  | MS, RI         | 1954 |
| M74  | Thymoquinone                                        | 38.885               | 164 | C <sub>10</sub> H <sub>12</sub> O <sub>2</sub> | 149 | 47745    | 0.17  | MS             | 1981 |
| M76  | 6-Allyl- <i>o</i> -cresol                           | 39.435               | 148 | C <sub>10</sub> H <sub>12</sub> O              | 148 | 19770    | 0.07  | MS             | 2000 |
| M79  | Methyleugenol                                       | 39.709               | 178 | C <sub>11</sub> H <sub>14</sub> O <sub>2</sub> | 178 | 6433     | 0.02  | MS, RI, REF    | 2011 |
| M82  | 2,3,5-Trimethoxytoluene                             | 40.407               | 182 | C <sub>10</sub> H <sub>14</sub> O <sub>3</sub> | 167 | 30224    | 0.11  | REF            | 2040 |
| M83  | 3,4,5-Trimethoxytoluene                             | 40.608               | 182 | C <sub>10</sub> H <sub>14</sub> O <sub>3</sub> | 182 | 317898   | 1.14  | MS, RI, REF    | 2048 |
| M88  | Dihydroeugenol                                      | 41.913               | 166 | C <sub>10</sub> H <sub>14</sub> O <sub>2</sub> | 137 | 735442   | 2.64  | MS, RI         | 2103 |
| M90  | Dihydroeugenol isomer                               | 42.203               | 166 | C <sub>10</sub> H <sub>14</sub> O <sub>2</sub> | 137 | 71840    | 0.26  | MS             | 2117 |
| M93  | Eugenol                                             | 43.255               | 164 | C <sub>10</sub> H <sub>12</sub> O <sub>2</sub> | 164 | 6582923  | 23.67 | MS, RI, REF    | 2166 |
| M94  | 1,2,4-Trimethoxybenzene isomer                      | 43.589               | 168 | C <sub>9</sub> H <sub>12</sub> O <sub>3</sub>  | 153 | 635719   | 2.29  | MS             | 2182 |
| M98  | Thymol                                              | 43.870               | 150 | C <sub>10</sub> H <sub>14</sub> O              | 135 | 246441   | 0.89  | MS, RI         | 2195 |
| M104 | Piperonal                                           | 44.354               | 150 | C <sub>8</sub> H <sub>6</sub> O <sub>3</sub>   | 149 | 329976   | 1.19  | MS, RI         | 2220 |
| M109 | Methoxyeugenol isomer                               | 44.889               | 194 | C <sub>11</sub> H <sub>14</sub> O <sub>3</sub> | 194 | 16336    | 0.06  | MS             | 2248 |
| M111 | <i>cis</i> -Isoeugenol                              | 45.092               | 164 | C <sub>10</sub> H <sub>12</sub> O <sub>2</sub> | 164 | 110098   | 0.40  | MS, RI         | 2259 |
| M114 | 1,2,3,4-Tetramethoxybenzene                         | 45.605               | 198 | C <sub>10</sub> H <sub>14</sub> O <sub>4</sub> | 198 | 27919    | 0.10  | MS, RI         | 2286 |
| M115 | 1,2,4-Trimethoxybenzene isomer                      | 46.354               | 168 | C <sub>9</sub> H <sub>12</sub> O <sub>3</sub>  | 153 | 473718   | 1.70  | MS             | 2334 |
| M116 | 3,4-Methylenedioxyacetophenone                      | 46.405               | 164 | C <sub>9</sub> H <sub>8</sub> O <sub>3</sub>   | 149 | 377751   | 1.36  | MS             | 2337 |
| M117 | Chavicol                                            | 46.612               | 134 | C <sub>9</sub> H <sub>10</sub> O               | 134 | 1405123  | 5.05  | MS, RI         | 2351 |
| M118 | 1,2,3-Trimethoxybenzene isomer                      | 46.687               | 168 | C <sub>9</sub> H <sub>12</sub> O <sub>3</sub>  | 168 | 387185   | 1.39  | MS             | 2356 |
| M121 | Methoxyeugenol isomer                               | 47.304               | 194 | C <sub>11</sub> H <sub>14</sub> O <sub>3</sub> | 194 | 10340    | 0.04  | MS             | 2398 |
| M122 | 3,4-Methylenedioxypropiphenone                      | 47.392               | 178 | C <sub>10</sub> H <sub>10</sub> O <sub>3</sub> | 149 | 99288    | 0.36  | MS, REF        | 2405 |
| M126 | Methoxyeugenol isomer                               | 47.845               | 194 | C <sub>11</sub> H <sub>14</sub> O <sub>3</sub> | 194 | 227149   | 0.82  | MS             | 2442 |
| M127 | Kakuol isomer                                       | 47.901               | 194 | C <sub>10</sub> H <sub>10</sub> O <sub>4</sub> | 165 | 624505   | 2.25  | MS             | 2447 |
| M128 | Mellein                                             | 48.262               | 178 | C <sub>10</sub> H <sub>10</sub> O <sub>3</sub> | 178 | 29777    | 0.11  | MS, RI         | 2476 |
| M130 | 2,6-Dimethoxyacetophenone                           | 48.585               | 180 | C <sub>10</sub> H <sub>12</sub> O <sub>3</sub> | 180 | 5568     | 0.02  | MS             | 2503 |
| M131 | 1-(3,4-Methylenedioxyphenyl)-propane-1-ol           | 48.777               | 180 | C <sub>10</sub> H <sub>12</sub> O <sub>3</sub> | 151 | 51400    | 0.18  | MS             | 2521 |
| M132 | Piperonal                                           | 48.928               | 152 | C <sub>8</sub> H <sub>6</sub> O <sub>3</sub>   | 152 | 15637    | 0.06  | MS             | 2534 |
| M134 | 3-Methoxy-5-methylphenol                            | 48.993               | 138 | C <sub>8</sub> H <sub>10</sub> O <sub>2</sub>  | 138 | 1316473  | 4.73  | MS, RI         | 2540 |
| M137 | Methoxyeugenol                                      | 49.069               | 194 | C <sub>11</sub> H <sub>14</sub> O <sub>3</sub> | 194 | 104000   | 0.37  | MS, RI         | 2547 |
| M138 | Kakuol                                              | 49.294               | 194 | C <sub>10</sub> H <sub>10</sub> O <sub>4</sub> | 165 | 10509763 | 37.79 | MS, REF        | 2568 |
| M139 | 2',4'-Dimethoxy-3'-methylpropiphenone isomer        | 49.690               | 208 | C <sub>12</sub> H <sub>16</sub> O <sub>3</sub> | 179 | 19389    | 0.07  | MS             | 2602 |
| M140 | Xanthoxilin                                         | 49.767               | 196 | C <sub>10</sub> H <sub>10</sub> O <sub>4</sub> | 181 | 347256   | 1.25  | MS             | 2608 |
| M143 | 3,4,5-Trimethoxyphenyl-2-propanone                  | 50.278               | 224 | C <sub>12</sub> H <sub>16</sub> O <sub>4</sub> | 181 | 27492    | 0.10  | MS             | 2649 |
| M146 | Propioveratrone                                     | 50.772               | 194 | C <sub>11</sub> H <sub>14</sub> O <sub>3</sub> | 194 | 27897    | 0.10  | MS             | 2687 |
| M148 | 2',4'-Dimethoxy-3'-methylpropiphenone               | 51.439               | 208 | C <sub>12</sub> H <sub>16</sub> O <sub>3</sub> | 179 | 69691    | 0.25  | MS             | 2735 |
| M152 | 1-Hydroxy-2-(prop-2-enyl)-4,5-methylenedioxybenzene | 52.691               | 178 | C <sub>10</sub> H <sub>10</sub> O <sub>3</sub> | 178 | 51784    | 0.19  | MS             | 2815 |

The note of Table S2 is also suitable for Table S14.

**Table S15.** The information of 11 VOCs identified in the blood of rats in ARR decoction-treated group by HS-SPME-GC-MS

| No.         | Compounds                             | t <sub>R</sub> (min) | MW  | Formula                                        | Ion | Area   | C (%) | Identification | RI   |
|-------------|---------------------------------------|----------------------|-----|------------------------------------------------|-----|--------|-------|----------------|------|
| <b>M74</b>  | Thymoquinone                          | 38.885               | 164 | C <sub>10</sub> H <sub>12</sub> O <sub>2</sub> | 149 | 6902   | 1.48  | MS             | 1981 |
| <b>M82</b>  | 2,3,5-Trimethoxytoluene               | 40.407               | 182 | C <sub>10</sub> H <sub>14</sub> O <sub>3</sub> | 167 | 32355  | 6.94  | REF            | 2040 |
| <b>M83</b>  | 3,4,5-Trimethoxytoluene               | 40.608               | 182 | C <sub>10</sub> H <sub>14</sub> O <sub>3</sub> | 182 | 305666 | 65.52 | MS, RI, REF    | 2048 |
| <b>M97</b>  | 2,4,5-Trimethoxybenzoic acid          | 43.823               | 212 | C <sub>10</sub> H <sub>12</sub> O <sub>5</sub> | 212 | 5925   | 1.27  | MS             | 2193 |
| <b>M104</b> | Piperonal                             | 44.354               | 150 | C <sub>8</sub> H <sub>6</sub> O <sub>3</sub>   | 149 | 3635   | 0.78  | MS, RI         | 2220 |
| <b>M107</b> | Elemicin                              | 44.508               | 208 | C <sub>12</sub> H <sub>16</sub> O <sub>3</sub> | 208 | 2416   | 0.52  | MS, RI, REF    | 2228 |
| <b>M108</b> | 3,4,5-Trimethoxytoluene isomer        | 44.767               | 182 | C <sub>10</sub> H <sub>14</sub> O <sub>3</sub> | 182 | 10389  | 2.23  | MS             | 2242 |
| <b>M116</b> | 3,4-Methylenedioxyacetophenone        | 46.405               | 164 | C <sub>9</sub> H <sub>8</sub> O <sub>3</sub>   | 149 | 25361  | 5.44  | MS             | 2337 |
| <b>M122</b> | 3,4-Methylenedioxypropiofenone        | 47.392               | 178 | C <sub>10</sub> H <sub>10</sub> O <sub>3</sub> | 149 | 14147  | 3.03  | MS, REF        | 2405 |
| <b>M138</b> | Kakuol                                | 49.294               | 194 | C <sub>10</sub> H <sub>10</sub> O <sub>4</sub> | 165 | 15402  | 3.30  | MS, REF        | 2568 |
| <b>M148</b> | 2',4'-Dimethoxy-3'-methylpropiofenone | 51.439               | 208 | C <sub>12</sub> H <sub>16</sub> O <sub>3</sub> | 179 | 44317  | 9.50  | MS             | 2735 |

The note of Table S2 is also suitable for Table S15.

**Table S16.** The information of five VOCs identified in the brain of rats in ARR decoction-treated group by HS-SPME-GC-MS

| No.         | Compounds                      | t <sub>R</sub> (min) | MW  | Formula                                        | Ion | Area  | C (%) | Identification | RI   |
|-------------|--------------------------------|----------------------|-----|------------------------------------------------|-----|-------|-------|----------------|------|
| <b>M82</b>  | 2,3,5-Trimethoxytoluene        | 40.407               | 182 | C <sub>10</sub> H <sub>14</sub> O <sub>3</sub> | 167 | 7317  | 9.26  | REF            | 2040 |
| <b>M83</b>  | 3,4,5-Trimethoxytoluene        | 40.608               | 182 | C <sub>10</sub> H <sub>14</sub> O <sub>3</sub> | 182 | 61790 | 78.18 | MS, RI, REF    | 2048 |
| <b>M107</b> | Elemicin                       | 44.508               | 208 | C <sub>12</sub> H <sub>16</sub> O <sub>3</sub> | 208 | 1032  | 1.31  | MS, RI, REF    | 2228 |
| <b>M122</b> | 3,4-Methylenedioxypropiofenone | 47.392               | 178 | C <sub>10</sub> H <sub>10</sub> O <sub>3</sub> | 149 | 3709  | 4.69  | MS, REF        | 2405 |
| <b>M138</b> | Kakuol                         | 49.294               | 194 | C <sub>10</sub> H <sub>10</sub> O <sub>4</sub> | 165 | 5186  | 6.56  | MS, REF        | 2567 |

The note of Table S2 is also suitable for Table S16.

**Table S17.** The information of five VOCs identified in the heart of rats in ARR decoction-treated group by HS-SPME-GC-MS

| No.         | Compounds                      | t <sub>R</sub> (min) | MW  | Formula                                        | Ion | Area  | C (%) | Identification | RI   |
|-------------|--------------------------------|----------------------|-----|------------------------------------------------|-----|-------|-------|----------------|------|
| <b>M82</b>  | 2,3,5-Trimethoxytoluene        | 40.407               | 182 | C <sub>10</sub> H <sub>14</sub> O <sub>3</sub> | 167 | 6880  | 10.06 | REF            | 2040 |
| <b>M83</b>  | 3,4,5-Trimethoxytoluene        | 40.608               | 182 | C <sub>10</sub> H <sub>14</sub> O <sub>3</sub> | 182 | 48886 | 71.51 | MS, RI, REF    | 2048 |
| <b>M93</b>  | Eugenol                        | 43.255               | 164 | C <sub>10</sub> H <sub>12</sub> O <sub>2</sub> | 164 | 4184  | 6.12  | MS, RI, REF    | 2167 |
| <b>M122</b> | 3,4-Methylenedioxypropiofenone | 47.392               | 178 | C <sub>10</sub> H <sub>10</sub> O <sub>3</sub> | 149 | 3580  | 5.24  | MS, REF        | 2406 |
| <b>M138</b> | Kakuol                         | 49.294               | 194 | C <sub>10</sub> H <sub>10</sub> O <sub>4</sub> | 165 | 4831  | 7.07  | MS, REF        | 2568 |

The note of Table S2 is also suitable for Table S17.



**Table S18.** The information of seven VOCs identified in the lung of rats in ARR decoction-treated group by HS-SPME-GC-MS

| No.         | Compounds                             | t <sub>R</sub> (min) | MW  | Formula                                        | Ion | Area  | C (%) | Identification | RI   |
|-------------|---------------------------------------|----------------------|-----|------------------------------------------------|-----|-------|-------|----------------|------|
| <b>M82</b>  | 2,3,5-Trimethoxytoluene               | 40.407               | 182 | C <sub>10</sub> H <sub>14</sub> O <sub>3</sub> | 167 | 8005  | 7.86  | REF            | 2040 |
| <b>M83</b>  | 3,4,5-Trimethoxytoluene               | 40.608               | 182 | C <sub>10</sub> H <sub>14</sub> O <sub>3</sub> | 182 | 52785 | 51.81 | MS, RI, REF    | 2048 |
| <b>M93</b>  | Eugenol                               | 43.255               | 164 | C <sub>10</sub> H <sub>12</sub> O <sub>2</sub> | 164 | 10359 | 10.17 | MS, RI, REF    | 2166 |
| <b>M115</b> | 1,2,4-Trimethoxybenzene isomer        | 46.354               | 168 | C <sub>9</sub> H <sub>12</sub> O <sub>3</sub>  | 153 | 1076  | 1.06  | MS             | 2334 |
| <b>M122</b> | 3,4-Methylenedioxypropiofenone        | 47.392               | 178 | C <sub>10</sub> H <sub>10</sub> O <sub>3</sub> | 149 | 2694  | 2.64  | MS, REF        | 2405 |
| <b>M138</b> | Kakuol                                | 49.294               | 194 | C <sub>10</sub> H <sub>10</sub> O <sub>4</sub> | 165 | 7861  | 7.72  | MS, REF        | 2568 |
| <b>M148</b> | 2',4'-Dimethoxy-3'-methylpropiofenone | 51.439               | 208 | C <sub>12</sub> H <sub>16</sub> O <sub>3</sub> | 179 | 19097 | 18.75 | MS             | 2735 |

The note of Table S2 is also suitable for Table S18.

**Table S19.** The information of nine VOCs identified in the spleen of rats in ARR decoction-treated group by HS-SPME-GC-MS

| No.         | Compounds                             | t <sub>R</sub> (min) | MW  | Formula                                        | Ion | Area  | C (%) | Identification | RI   |
|-------------|---------------------------------------|----------------------|-----|------------------------------------------------|-----|-------|-------|----------------|------|
| <b>M64</b>  | Safrole                               | 35.108               | 162 | C <sub>10</sub> H <sub>10</sub> O <sub>2</sub> | 162 | 416   | 0.39  | MS, RI, REF    | 1862 |
| <b>M79</b>  | Methyleugenol                         | 39.709               | 178 | C <sub>11</sub> H <sub>14</sub> O <sub>2</sub> | 178 | 1640  | 1.53  | MS, RI, REF    | 2011 |
| <b>M82</b>  | 2,3,5-Trimethoxytoluene               | 40.407               | 182 | C <sub>10</sub> H <sub>14</sub> O <sub>3</sub> | 167 | 9348  | 8.72  | REF            | 2040 |
| <b>M83</b>  | 3,4,5-Trimethoxytoluene               | 40.608               | 182 | C <sub>10</sub> H <sub>14</sub> O <sub>3</sub> | 182 | 64942 | 60.58 | MS, RI, REF    | 2048 |
| <b>M93</b>  | Eugenol                               | 43.255               | 164 | C <sub>10</sub> H <sub>12</sub> O <sub>2</sub> | 164 | 7274  | 6.79  | MS, RI, REF    | 2166 |
| <b>M107</b> | Elemicin                              | 44.508               | 208 | C <sub>12</sub> H <sub>16</sub> O <sub>3</sub> | 208 | 1458  | 1.36  | MS, RI, REF    | 2228 |
| <b>M122</b> | 3,4-Methylenedioxypropiofenone        | 47.392               | 178 | C <sub>10</sub> H <sub>10</sub> O <sub>3</sub> | 149 | 4218  | 3.93  | MS, REF        | 2405 |
| <b>M138</b> | Kakuol                                | 49.294               | 194 | C <sub>10</sub> H <sub>10</sub> O <sub>4</sub> | 165 | 7466  | 6.96  | MS, REF        | 2568 |
| <b>M148</b> | 2',4'-Dimethoxy-3'-methylpropiofenone | 51.439               | 208 | C <sub>12</sub> H <sub>16</sub> O <sub>3</sub> | 179 | 10432 | 9.73  | MS             | 2735 |

The note of Table S2 is also suitable for Table S19.

**Table S20.** The information of 18 VOCs identified in the liver of rats in ARR decoction-treated group by HS-SPME-GC-MS

| No.         | Compounds                                 | t <sub>R</sub> (min) | MW  | Formula                                        | Ion | Area   | C (%) | Identification | RI   |
|-------------|-------------------------------------------|----------------------|-----|------------------------------------------------|-----|--------|-------|----------------|------|
| <b>M20</b>  | <i>dl</i> -Camphor                        | 15.291               | 152 | C <sub>10</sub> H <sub>16</sub> O              | 95  | 2153   | 0.43  | MS, RI         | 1507 |
| <b>M43</b>  | 4-Ethylbenzaldehyde                       | 25.836               | 134 | C <sub>9</sub> H <sub>10</sub> O               | 134 | 56455  | 11.40 | MS, RI         | 1694 |
| <b>M60</b>  | 3,5-Dimethoxytoluene                      | 34.265               | 152 | C <sub>9</sub> H <sub>12</sub> O <sub>2</sub>  | 152 | 1688   | 0.34  | MS, RI, REF    | 1841 |
| <b>M64</b>  | Safrole                                   | 35.108               | 162 | C <sub>10</sub> H <sub>10</sub> O <sub>2</sub> | 162 | 1238   | 0.25  | MS, RI, REF    | 1862 |
| <b>M74</b>  | Thymoquinone                              | 38.885               | 164 | C <sub>10</sub> H <sub>12</sub> O <sub>2</sub> | 149 | 11724  | 2.37  | MS             | 1981 |
| <b>M79</b>  | Methyleugenol                             | 39.709               | 178 | C <sub>11</sub> H <sub>14</sub> O <sub>2</sub> | 178 | 3244   | 0.65  | MS, RI, REF    | 2011 |
| <b>M82</b>  | 2,3,5-Trimethoxytoluene                   | 40.407               | 182 | C <sub>10</sub> H <sub>14</sub> O <sub>3</sub> | 167 | 30844  | 6.23  | REF            | 2040 |
| <b>M83</b>  | 3,4,5-Trimethoxytoluene                   | 40.608               | 182 | C <sub>10</sub> H <sub>14</sub> O <sub>3</sub> | 182 | 241327 | 48.72 | MS, RI, REF    | 2048 |
| <b>M88</b>  | Dihydroeugenol                            | 41.913               | 166 | C <sub>10</sub> H <sub>14</sub> O <sub>2</sub> | 137 | 1906   | 0.38  | MS, RI         | 2103 |
| <b>M93</b>  | Eugenol                                   | 43.255               | 164 | C <sub>10</sub> H <sub>12</sub> O <sub>2</sub> | 164 | 18209  | 3.68  | MS, RI         | 2166 |
| <b>M107</b> | Elemicin                                  | 44.508               | 208 | C <sub>12</sub> H <sub>16</sub> O <sub>3</sub> | 208 | 3721   | 0.75  | MS, RI, REF    | 2228 |
| <b>M108</b> | 3,4,5-Trimethoxytoluene isomer            | 44.767               | 182 | C <sub>10</sub> H <sub>14</sub> O <sub>3</sub> | 182 | 7437   | 1.50  | MS             | 2242 |
| <b>M115</b> | 1,2,4-Trimethoxybenzene isomer            | 46.354               | 168 | C <sub>9</sub> H <sub>12</sub> O <sub>3</sub>  | 153 | 1694   | 0.34  | MS             | 2334 |
| <b>M117</b> | Chavicol                                  | 46.612               | 134 | C <sub>9</sub> H <sub>10</sub> O               | 134 | 4782   | 0.97  | MS, RI         | 2351 |
| <b>M122</b> | 3,4-Methylenedioxypropiophenone           | 47.392               | 178 | C <sub>10</sub> H <sub>10</sub> O <sub>3</sub> | 149 | 18247  | 3.68  | MS, REF        | 2405 |
| <b>M131</b> | 1-(3,4-Methylenedioxyphenyl)-propane-1-ol | 48.777               | 180 | C <sub>10</sub> H <sub>12</sub> O <sub>3</sub> | 151 | 2935   | 0.59  | MS             | 2521 |
| <b>M138</b> | Kakuol                                    | 49.294               | 194 | C <sub>10</sub> H <sub>10</sub> O <sub>4</sub> | 165 | 42059  | 8.49  | MS, REF        | 2568 |
| <b>M148</b> | 2',4'-Dimethoxy-3'-methylpropiophenone    | 51.439               | 208 | C <sub>12</sub> H <sub>16</sub> O <sub>3</sub> | 179 | 45693  | 9.22  | MS             | 2735 |

The note of Table S2 is also suitable for Table S20.

**Table S21.** The information of 26 VOCs identified in the kidney of rats in ARR decoction-treated group by HS-SPME-GC-MS

| No.         | Compounds                                    | t <sub>R</sub> (min) | MW  | Formula                                        | Ion | Area   | C (%) | Identification | RI   |
|-------------|----------------------------------------------|----------------------|-----|------------------------------------------------|-----|--------|-------|----------------|------|
| <b>M15</b>  | <i>cis</i> -Limonene oxide                   | 13.131               | 152 | C <sub>10</sub> H <sub>16</sub> O              | 137 | 3031   | 0.18  | MS, RI         | 1441 |
| <b>M20</b>  | <i>dl</i> -Camphor                           | 15.291               | 152 | C <sub>10</sub> H <sub>16</sub> O              | 95  | 31696  | 1.93  | MS, RI         | 1507 |
| <b>M22</b>  | Eucarvone                                    | 17.067               | 150 | C <sub>10</sub> H <sub>14</sub> O              | 107 | 3448   | 0.21  | MS, REF        | 1543 |
| <b>M40</b>  | Eucarvone isomer                             | 25.014               | 150 | C <sub>10</sub> H <sub>14</sub> O              | 107 | 3969   | 0.24  | MS             | 1680 |
| <b>M44</b>  | Borneol                                      | 25.881               | 154 | C <sub>10</sub> H <sub>18</sub> O              | 95  | 72403  | 4.42  | MS, RI         | 1694 |
| <b>M60</b>  | 3,5-Dimethoxytoluene                         | 34.265               | 152 | C <sub>9</sub> H <sub>12</sub> O <sub>2</sub>  | 152 | 1907   | 0.12  | MS, RI         | 1841 |
| <b>M64</b>  | Safrole                                      | 35.108               | 162 | C <sub>10</sub> H <sub>10</sub> O <sub>2</sub> | 162 | 1811   | 0.11  | MS, RI, REF    | 1862 |
| <b>M66</b>  | Verbenone isomer                             | 36.215               | 150 | C <sub>10</sub> H <sub>14</sub> O              | 150 | 9297   | 0.57  | MS             | 1891 |
| <b>M74</b>  | Thymoquinone                                 | 38.885               | 164 | C <sub>10</sub> H <sub>12</sub> O <sub>2</sub> | 149 | 139229 | 8.50  | MS             | 1981 |
| <b>M79</b>  | Methyleugenol                                | 39.709               | 178 | C <sub>11</sub> H <sub>14</sub> O <sub>2</sub> | 178 | 5070   | 0.31  | MS, RI         | 2011 |
| <b>M82</b>  | 2,3,5-Trimethoxytoluene                      | 40.407               | 182 | C <sub>10</sub> H <sub>14</sub> O <sub>3</sub> | 167 | 55625  | 3.39  | REF            | 2040 |
| <b>M83</b>  | 3,4,5-Trimethoxytoluene                      | 40.608               | 182 | C <sub>10</sub> H <sub>14</sub> O <sub>3</sub> | 182 | 557810 | 34.04 | MS, RI, REF    | 2048 |
| <b>M84</b>  | 3,4,5-Trimethoxybenzoic acid                 | 40.787               | 212 | C <sub>10</sub> H <sub>12</sub> O <sub>5</sub> | 212 | 843    | 0.05  | MS             | 2056 |
| <b>M93</b>  | Eugenol                                      | 43.255               | 164 | C <sub>10</sub> H <sub>12</sub> O <sub>2</sub> | 164 | 232132 | 14.16 | MS, RI         | 2166 |
| <b>M97</b>  | 2,4,5-Trimethoxybenzoic acid                 | 43.823               | 212 | C <sub>10</sub> H <sub>12</sub> O <sub>5</sub> | 212 | 7656   | 0.47  | MS             | 2193 |
| <b>M107</b> | Elemicin                                     | 44.508               | 208 | C <sub>12</sub> H <sub>16</sub> O <sub>3</sub> | 208 | 4490   | 0.27  | MS, RI, REF    | 2228 |
| <b>M108</b> | 3,4,5-Trimethoxytoluene isomer               | 44.767               | 182 | C <sub>10</sub> H <sub>14</sub> O <sub>3</sub> | 182 | 12478  | 0.76  | MS             | 2242 |
| <b>M115</b> | 1,2,4-Trimethoxybenzene isomer               | 46.354               | 168 | C <sub>9</sub> H <sub>12</sub> O <sub>3</sub>  | 153 | 31550  | 1.93  | MS             | 2334 |
| <b>M117</b> | Chavicol                                     | 46.612               | 134 | C <sub>9</sub> H <sub>10</sub> O               | 134 | 19571  | 1.19  | MS, RI         | 2351 |
| <b>M122</b> | 3,4-Methylenedioxypropiofenone               | 47.392               | 178 | C <sub>10</sub> H <sub>10</sub> O <sub>3</sub> | 149 | 19096  | 1.17  | MS, REF        | 2405 |
| <b>M127</b> | Kakuol isomer                                | 47.901               | 194 | C <sub>10</sub> H <sub>10</sub> O <sub>4</sub> | 165 | 8616   | 0.53  | MS             | 2447 |
| <b>M131</b> | 1-(3,4-Methylenedioxyphenyl)-propane-1-ol    | 48.777               | 180 | C <sub>10</sub> H <sub>12</sub> O <sub>3</sub> | 151 | 2958   | 0.18  | MS             | 2521 |
| <b>M138</b> | Kakuol                                       | 49.294               | 194 | C <sub>10</sub> H <sub>10</sub> O <sub>4</sub> | 165 | 313796 | 19.15 | MS, REF        | 2568 |
| <b>M139</b> | 2',4'-Dimethoxy-3'-methylpropiofenone isomer | 49.690               | 208 | C <sub>12</sub> H <sub>16</sub> O <sub>3</sub> | 179 | 41301  | 2.52  | MS             | 2602 |
| <b>M142</b> | 2',4'-Dimethoxy-3'-methylpropiofenone isomer | 50.226               | 208 | C <sub>12</sub> H <sub>16</sub> O <sub>3</sub> | 179 | 8877   | 0.54  | MS             | 2645 |
| <b>M148</b> | 2',4'-Dimethoxy-3'-methylpropiofenone        | 51.439               | 208 | C <sub>12</sub> H <sub>16</sub> O <sub>3</sub> | 179 | 50176  | 3.06  | MS             | 2735 |

The note of Table S2 is also suitable for Table S21.

**Table S22.** The information of 32 VOCs identified in the stomach of rats in ARR decoction-treated

group by HS-SPME-GC-MS

| No.         | Compounds                                    | t <sub>R</sub> (min) | MW  | Formula                                        | Ion | Area    | C (%) | Identification | RI   |
|-------------|----------------------------------------------|----------------------|-----|------------------------------------------------|-----|---------|-------|----------------|------|
| <b>M10</b>  | <i>o</i> -Cymene                             | 8.646                | 134 | C <sub>10</sub> H <sub>14</sub>                | 119 | 2769    | 0.03  | MS, RI         | 1269 |
| <b>M19</b>  | Pentadecane                                  | 14.953               | 212 | C <sub>15</sub> H <sub>32</sub>                | 85  | 93104   | 1.17  | MS, RI         | 1500 |
| <b>M20</b>  | <i>dl</i> -Camphor                           | 15.291               | 152 | C <sub>10</sub> H <sub>16</sub> O              | 95  | 1544    | 0.02  | MS, RI         | 1507 |
| <b>M44</b>  | Borneol                                      | 25.881               | 154 | C <sub>10</sub> H <sub>18</sub> O              | 95  | 18466   | 0.23  | MS, RI         | 1694 |
| <b>M60</b>  | 3,5-Dimethoxytoluene                         | 34.265               | 152 | C <sub>9</sub> H <sub>12</sub> O <sub>2</sub>  | 152 | 2529    | 0.03  | MS, RI, REF    | 1841 |
| <b>M74</b>  | Thymoquinone                                 | 38.885               | 164 | C <sub>10</sub> H <sub>12</sub> O <sub>2</sub> | 149 | 4928    | 0.06  | MS             | 1981 |
| <b>M79</b>  | Methyleugenol                                | 39.709               | 178 | C <sub>11</sub> H <sub>14</sub> O <sub>2</sub> | 178 | 80069   | 1.00  | MS, RI, REF    | 2011 |
| <b>M82</b>  | 2,3,5-Trimethoxytoluene                      | 40.407               | 182 | C <sub>10</sub> H <sub>14</sub> O <sub>3</sub> | 167 | 292668  | 3.66  | REF            | 2040 |
| <b>M83</b>  | 3,4,5-Trimethoxytoluene                      | 40.608               | 182 | C <sub>10</sub> H <sub>14</sub> O <sub>3</sub> | 182 | 1895207 | 23.72 | MS, RI, REF    | 2048 |
| <b>M84</b>  | 3,4,5-Trimethoxybenzoic acid                 | 40.787               | 212 | C <sub>10</sub> H <sub>12</sub> O <sub>5</sub> | 212 | 9511    | 0.12  | MS             | 2056 |
| <b>M86</b>  | 1,2,4-Trimethoxybenzene                      | 41.437               | 168 | C <sub>9</sub> H <sub>12</sub> O <sub>3</sub>  | 168 | 3192    | 0.04  | MS, RI         | 2083 |
| <b>M93</b>  | Eugenol                                      | 43.255               | 164 | C <sub>10</sub> H <sub>12</sub> O <sub>2</sub> | 164 | 47827   | 0.60  | MS, RI, REF    | 2166 |
| <b>M95</b>  | 4-Methoxysafrole                             | 43.747               | 192 | C <sub>11</sub> H <sub>12</sub> O <sub>3</sub> | 192 | 7727    | 0.10  | MS, RI         | 2189 |
| <b>M97</b>  | 2,4,5-Trimethoxybenzoic acid                 | 43.823               | 212 | C <sub>10</sub> H <sub>12</sub> O <sub>5</sub> | 212 | 38856   | 0.49  | MS             | 2193 |
| <b>M107</b> | Elemicin                                     | 44.508               | 208 | C <sub>12</sub> H <sub>16</sub> O <sub>3</sub> | 208 | 110865  | 1.39  | MS, RI, REF    | 2228 |
| <b>M108</b> | 3,4,5-Trimethoxytoluene isomer               | 44.767               | 182 | C <sub>10</sub> H <sub>14</sub> O <sub>3</sub> | 182 | 36703   | 0.46  | MS             | 2242 |
| <b>M112</b> | β-Asarone                                    | 45.186               | 208 | C <sub>12</sub> H <sub>16</sub> O <sub>3</sub> | 208 | 16725   | 0.21  | MS, RI, REF    | 2264 |
| <b>M116</b> | 3,4-Methylenedioxyacetophenone               | 46.405               | 164 | C <sub>9</sub> H <sub>8</sub> O <sub>3</sub>   | 149 | 9412    | 0.12  | MS             | 2337 |
| <b>M117</b> | Chavicol                                     | 46.612               | 134 | C <sub>9</sub> H <sub>10</sub> O               | 134 | 12360   | 0.15  | MS, RI         | 2351 |
| <b>M122</b> | 3,4-Methylenedioxypropiofenone               | 47.392               | 178 | C <sub>10</sub> H <sub>10</sub> O <sub>3</sub> | 149 | 1239697 | 15.51 | MS, REF        | 2405 |
| <b>M126</b> | Methoxyeugenol isomer                        | 47.845               | 194 | C <sub>11</sub> H <sub>14</sub> O <sub>3</sub> | 194 | 8106    | 0.10  | MS             | 2442 |
| <b>M127</b> | Kakuol isomer                                | 47.901               | 194 | C <sub>10</sub> H <sub>10</sub> O <sub>4</sub> | 165 | 33782   | 0.42  | MS             | 2447 |
| <b>M128</b> | Mellein                                      | 48.262               | 178 | C <sub>10</sub> H <sub>10</sub> O <sub>3</sub> | 178 | 6404    | 0.08  | MS, RI         | 2476 |
| <b>M131</b> | 1-(3,4-Methylenedioxyphenyl)-propane-1-ol    | 48.777               | 180 | C <sub>10</sub> H <sub>12</sub> O <sub>3</sub> | 151 | 54614   | 0.68  | MS             | 2521 |
| <b>M136</b> | 4,6-Dimethoxy-phthalide                      | 49.065               | 194 | C <sub>10</sub> H <sub>10</sub> O <sub>4</sub> | 194 | 18922   | 0.24  | MS             | 2546 |
| <b>M138</b> | Kakuol                                       | 49.294               | 194 | C <sub>10</sub> H <sub>10</sub> O <sub>4</sub> | 165 | 2362595 | 29.56 | MS, RI, REF    | 2568 |
| <b>M139</b> | 2',4'-Dimethoxy-3'-methylpropiofenone isomer | 49.690               | 208 | C <sub>12</sub> H <sub>16</sub> O <sub>3</sub> | 179 | 107242  | 1.34  | MS             | 2602 |
| <b>M140</b> | Xanthoxylin                                  | 49.767               | 196 | C <sub>10</sub> H <sub>10</sub> O <sub>4</sub> | 181 | 45209   | 0.57  | MS             | 2608 |
| <b>M144</b> | 4-(Dimethoxymethyl)-1,2-dimethoxybenzene     | 50.621               | 212 | C <sub>11</sub> H <sub>16</sub> O <sub>4</sub> | 181 | 15560   | 0.19  | MS             | 2676 |
| <b>M145</b> | 2',4'-Dimethoxypropiofenone                  | 50.760               | 194 | C <sub>11</sub> H <sub>14</sub> O <sub>3</sub> | 194 | 5452    | 0.07  | MS             | 2687 |
| <b>M148</b> | 2',4'-Dimethoxy-3'-methylpropiofenone        | 51.439               | 208 | C <sub>12</sub> H <sub>16</sub> O <sub>3</sub> | 179 | 1392210 | 17.42 | MS             | 2735 |
| <b>M151</b> | 1,2-Dimethoxy-4-(1,2-dimethoxyethyl)-benzene | 52.205               | 226 | C <sub>12</sub> H <sub>18</sub> O <sub>4</sub> | 181 | 17021   | 0.21  | MS             | 2786 |

The note of Table S2 is also suitable for Table S22.

**Table S23.** The information of 19 VOCs identified in the small intestine of rats in ARR decoction-treated group by HS-SPME-GC-MS

| No.         | Compounds                                    | t <sub>R</sub> (min) | MW  | Formula                                        | Ion | Area   | C (%) | Identification | RI   |
|-------------|----------------------------------------------|----------------------|-----|------------------------------------------------|-----|--------|-------|----------------|------|
| <b>M20</b>  | <i>dl</i> -Camphor                           | 15.291               | 152 | C <sub>10</sub> H <sub>16</sub> O              | 95  | 2376   | 0.31  | MS, RI         | 1507 |
| <b>M60</b>  | 3,5-Dimethoxytoluene                         | 34.265               | 152 | C <sub>9</sub> H <sub>12</sub> O <sub>2</sub>  | 152 | 2141   | 0.28  | MS, RI, REF    | 1841 |
| <b>M64</b>  | Safrole                                      | 35.108               | 162 | C <sub>10</sub> H <sub>10</sub> O <sub>2</sub> | 162 | 2499   | 0.32  | MS, RI, REF    | 1863 |
| <b>M79</b>  | Methyleugenol                                | 39.709               | 178 | C <sub>11</sub> H <sub>14</sub> O <sub>2</sub> | 178 | 6909   | 0.90  | MS, RI, REF    | 2011 |
| <b>M82</b>  | 2,3,5-Trimethoxytoluene                      | 40.407               | 182 | C <sub>10</sub> H <sub>14</sub> O <sub>3</sub> | 167 | 26107  | 3.39  | REF            | 2040 |
| <b>M83</b>  | 3,4,5-Trimethoxytoluene                      | 40.608               | 182 | C <sub>10</sub> H <sub>14</sub> O <sub>3</sub> | 182 | 133284 | 17.30 | MS, RI, REF    | 2049 |
| <b>M93</b>  | Eugenol                                      | 43.255               | 164 | C <sub>10</sub> H <sub>12</sub> O <sub>2</sub> | 164 | 118092 | 15.33 | MS, RI, REF    | 2167 |
| <b>M98</b>  | Thymol                                       | 43.870               | 150 | C <sub>10</sub> H <sub>14</sub> O              | 135 | 4450   | 0.58  | MS, RI         | 2197 |
| <b>M107</b> | Elemicin                                     | 44.508               | 208 | C <sub>12</sub> H <sub>16</sub> O <sub>3</sub> | 208 | 6991   | 0.91  | MS, RI, REF    | 2228 |
| <b>M108</b> | 3,4,5-Trimethoxytoluene isomer               | 44.767               | 182 | C <sub>10</sub> H <sub>14</sub> O <sub>3</sub> | 182 | 3286   | 0.43  | MS             | 2242 |
| <b>M115</b> | 1,2,4-Trimethoxybenzene isomer               | 46.354               | 168 | C <sub>9</sub> H <sub>12</sub> O <sub>3</sub>  | 153 | 17542  | 2.28  | MS             | 2335 |
| <b>M117</b> | Chavicol                                     | 46.612               | 134 | C <sub>9</sub> H <sub>10</sub> O               | 134 | 33855  | 4.39  | MS, RI         | 2351 |
| <b>M122</b> | 3,4-Methylenedioxypropiphenone               | 47.392               | 178 | C <sub>10</sub> H <sub>10</sub> O <sub>3</sub> | 149 | 40703  | 5.28  | MS, REF        | 2406 |
| <b>M131</b> | 1-(3,4-Methylenedioxyphenyl)-propane-1-ol    | 48.777               | 180 | C <sub>10</sub> H <sub>12</sub> O <sub>3</sub> | 151 | 9822   | 1.27  | MS             | 2521 |
| <b>M134</b> | 3-Methoxy-5-methylphenol                     | 48.993               | 138 | C <sub>8</sub> H <sub>10</sub> O <sub>2</sub>  | 138 | 74624  | 9.68  | MS, RI         | 2540 |
| <b>M138</b> | Kakuol                                       | 49.294               | 194 | C <sub>10</sub> H <sub>10</sub> O <sub>4</sub> | 165 | 219150 | 28.44 | MS, REF        | 2568 |
| <b>M139</b> | 2',4'-Dimethoxy-3'-methylpropiphenone isomer | 49.690               | 208 | C <sub>12</sub> H <sub>16</sub> O <sub>3</sub> | 179 | 5841   | 0.76  | MS             | 2603 |
| <b>M140</b> | Xanthoxilin                                  | 49.767               | 196 | C <sub>10</sub> H <sub>10</sub> O <sub>4</sub> | 181 | 5654   | 0.73  | MS             | 2608 |
| <b>M148</b> | 2',4'-Dimethoxy-3'-methylpropiphenone        | 51.439               | 208 | C <sub>12</sub> H <sub>16</sub> O <sub>3</sub> | 179 | 57247  | 7.43  | MS             | 2735 |

The note of Table S2 is also suitable for Table S23.
